# Supplementary material for: A systematic review of statistical methodology used to evaluate progression of chronic kidney disease using electronic healthcare records
Source: PLoS One. 2022 Jul 29;17(7):e0264167. doi: 10.1371/journal.pone.0264167 (PMC9337679; doi:10.1371/journal.pone.0264167)
Supplement: S1 Data — (XLSX) [file pone.0264167.s008.xlsx]

## Sheet: Sheet1
Ref	Title	Journal	Date of publication	Data collection timeframe	Primary decade of follow up	Country of study population	Data source category	Include? EHRs?	Data source details	Main morbidity	Population description	Mean Age	Indicator if median age reported	Percent male	Other features of population	Purpose of analysis category	Purpose of analysis details	Study design	Min renal function measures for analysis	Analysis criteria	Sample size at study start [pre-exclusions]	Sample size for main analysis	Number dropped out during follow up	Percent analysed main analysis	Percent dropped out main analysis	Sample size details	Kidney function marker	Formula used	Change in renal function measure	Method of derivation	Progression definition term, if applicable	Progression definition, if applicable	Details	Kidney function as exposure or outcome?	If kidney function change measure is exposure, what is outcome?	change in renal function primary or secondary aim?	Statistical tools used	Methods category	Methods details	Follow up time	Follow up years	Study conclusion	Handling sample represenativeness	Methods sample representativeness	Handling dropouts	Methods dropouts	Handling longitudinal missingness	Methods longitudinal missingness	Handling covariate missingness
Joss N et al [1]	Diabetic nephropathy: how effective is treatment in clinical practice?	QJM: An international journal of medicine	2002	1989-1999	1990-1999	UK	outpatient diabetic-renal	INCLUDE; states EHRs used	EHRs for diabetic-renal clinic in Glasgow	Diabetic nephropathy	patients referred to diabetic-renal clinic with a diabetic nephropathy diagnosis between 1989-1999	58	1	0.49		risk factor identification / causal inference	identification of risk factors associated with progression; establishing whether clinics improve renal function	retrospective cohort study	4	4+ measures of creatinine over a minimum of 6 months, no death/RRT in first year	170	125	62	0.74	0.5	170 pts identified with diabetic nephropathy; MAIN analysis for FU >1 year: 125 (74%) [excluded: 45 death/RRT in first year] [during FU to 3 years: 32 died/RRT & 30 LTFU]	estimated creatinine clearance	Cockcroft and Gault	regression slope of ECC	individual linear regression	none defined	none defined		outcome	N/A	primary outcome	multivariate linear regression	linear regression	multivariate linear regression model over >1 year	Median 36 months if >1 year follow up	3	Age, ACR, and cholesterol are independent predictors of a faster rate of progression of renal disease; referral to diabetic-renal clinic slows CKD progression	Partially acknowledged implications of sample completeness	None	Partially acknowledged implications of losses to follow up	None	Mentioned data completeness, but not implications	None	Mentioned data completeness, but not implications
Dean BB et al [2]	Erythropoiesis-stimulating protein therapy and the decline of renal function: a retrospective analysis of patients with chronic kidney disease	Current medical research and opinion	2005	1998-2002	2000-2009	USA	outpatient	INCLUDE; states EHRs used	electronic medical records from the Veterans Administration; all outpatient facilities within the VA Greater Los Angeles Healthcare System (no inpatient data)	CKD	pre-dialysis patients with CKD	72		0.98	veterans	risk factor identification / causal inference	to determine whether ESA treatment can reduce the rate of decline in renal function	retrospective cohort study	4	at least 2 serum creatinine measures before and after ESP treatment, separated by a minimum of 6 months; ESP treatment to start within 90 days of ESP treatment; at least 8 ESP treatments required	not mentioned	122	not mentioned	not available	not available		inverse creatinine	N/A	regression slope of inverse creatinine	individual linear regression	none defined	none defined		outcome	N/A	primary outcome	multivariate linear regression	linear regression	Adjustments for age, gender, hyperlipidemia, MI, Hgb at ESP-inititiation, ACE/Arb use; model weighted by inverse of the variance of difference between slopes (estimated as sum of variances of pre- and post- treatment slopes) in order to give more weight to patients with more creatinine measures	mean 1.6 years	1.6	Renal function declined at a slower rate after ESP therapy; none of the independent variables examined had a significant effect on rate of disease progression	Partially acknowledged implications of sample completeness	None	Not mentioned	None	Patrially acknowledged implications of data completeness	None	Not mentioned
Gallant JE et al [3]	Changes in renal funcion associated with tenofovir disoproxil fumarate treatment, compared with nucleoside reverse-transcriptase inhibitor treatment	HIV/AIDs	2005	2001-2004	2000-2009	USA	multiple care settings	INCLUDE; states EHRs used	Patients enrolled at HIV clinic, but data collected from all healthcare settings; database updated every 6 months	HIV	HIV patients starting therapy between Jan 2001 and Dec 2003 with either TDF or NRTI as part of HAART regimen	38	1	0.72		risk factor identification / causal inference	to assess the effect of treatment on renal function in clinical practice	retrospective cohort study	3	unclear; assume avg of 2 x creat pre-therapy plus max creat wihtin 1-year of therapy start (assume strong availability of data at baseline)	not mentioned	658	not mentioned	not available	not available	It is possible that 100% of population was analysed due to comprehensive database	estimated creatinine clearance (ECC)	Cockcroft and Gault	percent change in ECC from baseline	N/A	decline in creatinine clearance	> 0% percent decline in creatinine clearance from baseline	compared avg of 2 baseline creatinine values with max creatinine within 1 year of therapy start	outcome	N/A	primary outcome	multivariate linear regression	linear regression	multiivariate linear regression for percent change in ECC; Also, Wilcoxon rank sum test for bivariate comparisons of absolute and percent change in ECC.	1 year	1	TDF treatment associated with a greater decline in renal function than NRTI treatment	Tackled methodologically	Detailed/ comprehensive database of EHRs used	Partially acknowledged implications of losses to follow up	None	Not mentioned	None	Not mentioned
Eriksen BO et al [4]	The progression of chronic kidney disease: a 10-year population-based study of the effects of gender and age	Kidney international	2006	1994-2003	1990-1999	Norway	multiple care settings	INCLUDE; states EHRs used	complete database of serum creatinine measurements in the community (including primary care, inpatient and outpatients); patient and renal survival follow up from hospital databases; well-defined geographical area, served by one provider of nephrology services (University Hospital of North Norway) and universal coverage	CKD	CKD stage 3 (eGFR 30-59 over >3 months)	75	1	0.3	all aged 20+	risk factor identification / causal inference	to study the effects of age and gender on eGFR decline (and on initiation of RRT, and death)	retrospective cohort study	2	2 x eGFR 30-59 over 3+ months	3047	3047	1021	1	0.34	38,241 patients had 1+ creatinine measure; 6,863 had 1+ eGFR 30-59; 3,074 had 2 eGFR 30-59 over 3+ monhts; 3,047 eligible after excluding patients initiating RRT; Table 1 shows 1021 (33%) patients LTFU due to death (31%) or ESRD/RRT (2%)	eGFR	MDRD	regression slope of eGFR	linear mixed model	rapid progression	regression slope < -5 units per year	[see methods details]; note: progression term and definition not used for analysis, purely descriptive in discussion of results	outcome	N/A	primary outcome	mixed modelling methods	linear mixed model	well-designed multi-level model of change in eGFR, with baseline adjustment and slope interaction for age and sex, as well as random intercept and slope for patient (also, nice interpretable model coefficients used); however, no adjustment for any other variables which may impact baseline eGFR and slope	median 3.7 years	3.7	Female gender was associated with slower decline in GFR and better patient and renal survival.	Fully acknowledged implications of sample completeness	None	Partially acknowledged implications of losses to follow up	None	Tackled methodologically	mixed modelling	Tackled methodologically or not an issue
Jones C et al [5]	An evaluation of a shared primary and secondary care nephrology service for managing patients with moderate to advanced CKD	American Journal of Kidney Disease	2006	1997-2006	2000-2009	UK	multiple care settings	INCLUDE; states EHRs used	Southampton Integrated Monitoring Nephrology (SIMON) Programme; Shared primary and nephrology care scheme (SCS); patients managed in primary care remotely assessed by nephrologists every 6-12 months as needed; SIMON database	CKD	New referrals of patients with CKD stages 3-5 to nephrology clinic or shared care scheme	75	1	0.61	mixed urban/rural area	risk factor identification / causal inference	Secondary aim: assess the change in GFR rate of decline for the 5 years before and after referral to SIMON	retrospective cohort study	6	at least 3 pre-referral and 3 post-referral serum creatinine measures	949	738	not mentioned	0.78	not available	949 new referrals; 738 had enough eGFR data to derive pre- and post-referral slopes; Of 211 without data, 158 had insufficient pre-referral data and 53 had insufficient post-referral data	eGFR	MDRD	regression slope of eGFR	individual linear regression	none defined	none defined	Individual regression slopes derived using linear regression (5 years pre-referral; 5 years post-referral)	outcome	N/A	secondary outcome	simple statistical tests	mean difference paired t-test	Individual linear regression to estimate pre-referral and post-referral eGFR slopes. Individual slopes were averaged to achieve a grouped slope. Slopes summarised overall and by subgroup (enrolled in SCS before 6 months in clinic, enrolled in SCS after 6 months in clinic, managed entirely in clinic)	not clear (max 10 years)	not stated	Both the SCS and clinic groups experienced a significant slowing in eGFR decline in the 5 years after referral, emphasizing that even moderate to advanced disease is not inevitably progressive, although an effect of regression to the mean cannot be discounted.	Partially acknowledged implications of sample completeness	None	Partially acknowledged implications of losses to follow up	None	Patrially acknowledged implications of data completeness	None	Not relevant (no covariate analysis)
Chen SC et al [6]	Slowing renal function decline in chronic kidney disease patients after nephrology referral	Nephrology (asian pacific)	2008	2001-2006	2000-2009	Taiwan	outpatient renal	INCLUDE; states EHRs used	nephrology divisions of one medical centre and one regional hospital; labs and medication obtained from hospital informatics	CKD	new referrals of patients with CKD stages 3-5 to nephrology divisions, eGFR < 60 at time of referral	65		0.65		risk factor identification / causal inference	to study the decline in renal function and factors related to the change in renal function before and after referral	retrospective cohort study	6	>= 3 serum creatinine measures during the 1-year period before and after nephrology referral; excluding patients with AKI or initiating dialysis within 1 year post-referral (for reasons of data completeness & variable eGFR)	not mentioned	213	0	not available	not relevant (complete case analysis)	patients did not drop out of analysis since complete data required for analysis, but many patients would not have been analysed (no data)	eGFR	MDRD	regression slope of eGFR	individual linear regression	none defined	none defined	Fot t-test: individual linear regression, pre- and post- referral; Main analysis = GEE investigating eGFR vs time with interaction terms	outcome	N/A	primary outcome	generalised estimating equations	generalised estimating equations	(1) t-test for difference in mean slope before and after referral; (2) GEEs assessed the association between nehrology referral and eGFR, adjusted for time, age, sex, diabetes, hypertension, CKD stage; (3) GEE with interaction between time (slope) and other variables (showing impact of variables on slope of decline) -> not sure results correctly interpreted in article	not stated	not stated	Decline in renal function slows after nephrology referral	Partially acknowledged implications of sample completeness	None	Not mentioned	None	Not mentioned	None	Not mentioned
O’Riordan A et al [7]	Renal biopsy in liver transplant recipients	NDT	2009	1996-?	2000-2009	UK	outpatient renal	INCLUDE; states EHRs used	renal and liver departments' prospectively compiled databases (1996 onwards); single-center	liver transplant recipients	liver transplant patients referred to renal services	53		0.65		risk factor identification / causal inference	to compare renal outcomes and survival in liver transplant recipients later referred to renal clinics by whether they had a renal biopsy	retrospective cohort study	not mentioned	Patients followed up for (time to) single eGFR<15 (or RRT or death) but no info on how regularly followed up	2100	54	not mentioned	0.03	not available	2100 adults had a liver transplant in the study period; 54 were referred for renal review; 23 had a biopsy and 31 had no biopsy; percent analysed based on liver transplant population which is seen as target population of interest (see discussion)	eGFR	MDRD	binary progression to threshold eGFR	single eGFR measure at any time; time to eGFR<15	renal survival endpoint	eGFR<15		outcome	N/A	primary outcome	KM / life-table	kaplan meier estimation + log-rank test	Kaplan meier for time from LT to eGFR<15 (inc RRT), with censoring at death and end of follow up; log-rank test for difference in time to event comparing biopsy vs no biopsy; additional KM for time to death	3.2 years	3.2	Patient management and survival did not differ significantly for biopsied vs no biopsy. There were baseline differences between groups but no statistically significant difference in renal outcome.	Partially acknowledged implications of sample completeness	None	Partially acknowledged implications of losses to follow up	None	Not mentioned	None	Not relevant (no covariate analysis)
Eriksen BO et al [8]	Predictors of declining glomerular filtration rate in a population-based chronic kidney disease cohort	Nephron Clinical Practice	2010	1994-2003	1990-1999	Norway	multiple care settings	INCLUDE; states EHRs used	database of all creatinine tests in routine care, including primary care and hospital inpatient and outpatient medical records	CKD	prevalent CKD stage 3 in population-based cohort	77		0.43		risk factor identification / causal inference	to study predictors of rate of change in GFR	retrospective cohort study	2	2 x eGFR 30-59 over 3+ months	1398	1224	not mentioned	0.88	not available	Pop coverage = 58,086; Pop 1+ creat = 38,241; Pop 1+ creat indicating CKD stage 3-5 = 2,965; Pop 2+ creat indicating CKD stage 3 = 1,224; (23 excluded due to RRT and 174 excluded with no follow-up GFR after 3 months); In percent analysed, included those with missing FU GFR in denominator but some won't have CKD	eGFR	MDRD	regression slope of eGFR	linear mixed model	progressors (vs non-progressors)	slope < 0 (vs slope >= 0)	slope of eGFR estimated by 2-level multivariate linear regression model	outcome	N/A	primary outcome	mixed modelling methods	linear mixed model	multiple imputation for missing covariate data; two-level multivariate linear regression model, incorporating baseline data as covariates to estimate indiviudal changes in eGFR (4 models including different covariates); statistical tests for quadratic terms for time and age and interaction term for proteinuria; tabulation of characteristics of progressors vs non-progressors	4.0 years	4	Male gender, diabetes, proteinuria, and higher MAP were independent predictors of faster decline in GFR. Results may indicate potential benefits for improved adherence to existing guidelines for treatment of older CKD patients.	Fully acknowledged implications of sample completeness	multiple imputation	Partially acknowledged implications of losses to follow up	None	Tackled methodologically	mixed modelling	Tackled methodologically or not an issue
Cummings DM et al [9]	Glycemic control patterns and kidney disease progression among primary care patients with diabetes mellitus	The journal of the american board of family medicine	2011	1998-2008	2000-2009	USA	primary care	INCLUDE; states EHRs used	an academic primary care practice	diabetes	medical-record established diagnosis of type 2 diabetes, seen in the primary care practice during 1998-2002	54		0.32	75% african american	risk factor identification / causal inference	to examine relationship between fluctuations in glycaemic control (HbA1C) over time and changes in EGFR	retrospective cohort study	2	require 5 HbA1C measures; eGFR evaluated at baseline and most recent follow up visit	2155	791	not mentioned	0.37	not available	Exclusions based on strict criteria for exposure data (5 HbA1c measures); lack of eGFR data not mentioned but since only 2 eGFR measures required, assume used most recently available measure	eGFR	MDRD	absolute change in eGFR from baseline	absolute change from baseline at most recent eGFR	worsening in CKD stage	increase of one or more CKD stages from baseline to final measurement (~8 yrs)	main analysis linear regression of change in eGFR from baseline; secondary analysis logistic regression for worsening CKD stage	outcome	N/A	primary outcome	multivariate linear regression	linear regression	(1) linear regression for eGFR change from baseline; (2) logistic regression for whether increase from baseline in CKD stage (adjusted for covariates using stepwise approach) [we consider linear regression as the main analysis, and logistic regression as secondary]	mean 7.6 years	7.6	age, SBP, baseline HbA1c, baseline eGFR and number of HbA1c values explained 27% of the variation in change in eGFR; measures regarding fluctuations in HbA1c explained very little additional variation	Mentioned sample completeness but not implications	None	Not mentioned	None	Not mentioned	None	Not mentioned
Abdelhafiz et al [10]	Natural history and predictors of faster glomerular filtration rate decline in a referred population of older patients with type 2 diabetes mellitus	Hospital Practice	2012	1993-2010	2000-2009	UK	outpatient diabetes	INCLUDE; states EHRs used	outpatient diabetes clinic in a district general hospital in the UK; laboratory test results during clinic follow up collected from laboratory; lab results downloaded from central lab database	type 2 diabetes	referred population of older patients (>= 65 years) with type 2 diabetes mellitus	70		0.54		risk factor identification / causal inference	to study the natural history and predictors of faster GFR decline	cross-sectional study	not mentioned	attending clinic for >= 5 years; no minimum requirement for eGFR	not mentioned	100	not mentioned	not available	not available	frequency of eGFR tests during follow up was mean 39.1 (range 18-84); patients sampled based on having at least 5 years attendance, hence not fully allowing for drop-outs; percent of patients excluded on this basis not provided	eGFR	MDRD	regression slope of eGFR	individual linear regression	faster decline	eGFR slope decline > mean (1.5 units per year)	regression slope expressed as annual rate of eGFR decline	outcome	N/A	primary outcome	GLMs	logistic regression	slope of eGFR decline per year dichotimised into above and below mean (1.5 units per year) to generate categorical variable for logistic regression; adjusted for covariates (only significicant variables from univariate logistic regressions added to multivariate model)	mean 14 years	14	Development of CVD at (LAST) clinic visit was only "predictor" of eGFR decline	Partially acknowledged implications of sample completeness	None	Mentioned losses to follow up but not implications	None	Not mentioned	None	Not mentioned
Boudville N et al [11]	Factors associated with Chronic Kidney Disease Progression in Australian Nephrology Practices	Nephron Clinical Practice	2012	not stated	not stated	Australia	outpatient renal	INCLUDE; states EHRs used	Nephrology practice electronic medical records, Audit4 software for specialists	CKD	CKD patients referred to nephrology practice, spread throughout Australia: prevalent and incdiencent adult CKD with at least two serum creatinine measurements at least 90 days apart; excluding RRT patients	69		0.57		risk factor identification / causal inference	Exploring factors associated with rate of CKD progression	retrospective cohort study	2	2 x eGFR, at least 90 days apart	not mentioned	1328	not mentioned	not available	not available	number CKD pts treated in nephrology practice not provided; 1328 (model 1,2); 216 (model 3)	eGFR	MDRD	rate of change in eGFR, not clearly defined	not detailed	none defined	none defined	measured between first entry of patient in Audit4 software and last creatinine measurement before data extraction	outcome	N/A	primary outcome	multivariate linear regression	linear regression	univariate and multivariate linear regression comparing rate of change in eGFR with other variables; variables with p<0.2 or of theoretical importance included in multivariate model; "subjects censored for death or ESKD"	mean 1.5 years	1.5	potential risk factors for CKD progression identified; current data quality may result in bias	Partially acknowledged implications of sample completeness	None	Not mentioned	None	Not mentioned	None	Partially acknowledged implications of data completeness
Dreyer G et al [12]	Progression of chronic kidney disease in a multi-ethnic community cohort of patients with diabetes mellitus	Diabetic medicine	2013	2005-2010	2000-2009	UK	primary care	INCLUDE; states EHRs used	extraction of EHRs from practice computer databases of 134 GP practices in East London (covering 98% of practices in the area)	diabetes	diabetes (type 1 and 2); eGFR 15-60 over 3+ months; age 30-75; dialysis patients excluded	64		0.56	population with 51% ethnic minorities and severely deprived	risk factor identification / causal inference	to examine whether there are differences in rate of CKD progression by ethnicity	retrospective cohort study	3	2 x eGFR 15-60 over 3+ months; at least 3 years of annual follow up data	not mentioned	3855	583	not available	0.15	Flow chart provided with exclusions, but not possible to compute percentage analysed from this since age criteria included after data availability critieria	eGFR	MDRD	regression slope of eGFR	linear mixed model	none defined	none defined	random effects (pt, GP); baseline covariate adjustment	outcome	N/A	primary outcome	mixed modelling methods	linear mixed model	linear mixed model with random effects for patient and practice; interaction term for time*ethnicity to allow for different slopes by ethnic group (heterogeneity); adjustments for age, sex, deprivation, co-morbidities, proteinuria, eGFR, presciprtions, etc. Analysis repeated in proteinuria only.	mean 4.3 years	4.3	Rate of CKD progression was significantly greater in South Asians than white patients	Partially acknowledged implications of sample completeness	None	Mentioned losses to follow up but not implications	None	Patrially acknowledged implications of data completeness	None	Partially acknowledged implications of data completeness
Herget-Rosenthal S et al [13]	Progressive chronic kidney disease in primary care: modifiable risk factors predictive model	Preventive Medicine	2013	2003-2006	2000-2009	Germany	primary care	INCLUDE; states EHRs used	longitudinal observational Chronic Kidney Disease in Primary Care in Germany (COPING) study, covering 10 GP practices in Germany	CKD	Patients with or at high risk of CKD: CKD = eGFR<60; high risk = hypertension for 5 years, diabetes for 10 years; patients exclusively managed in primary care	65		0.51		risk prediction	3 objectives: (1) determine incidence/prevalence of CKD and progressive GFR decline; (2) identify modifiable risk factors; (3) develop model to predict progressive GFR decline [we decided risk prediction was tha main analysis, based on focus of conclusions]	retrospective cohort study	2	not clear but looks like one eGFR in 2003 and one eGFR in 2006	not mentioned	803	0	not available	not relevant (complete case analysis)	Patients only included if renal function data available; 100% of identified population analysed; missing covariate data imputed	eGFR	CKD-EPI	rate of change in eGFR, not clearly defined	not stated (but looks like absolute change between 2 measures, divided by 3 years time elapsed) (annual eGFR decline)	progressive GFR decline	eGFR slope decline > 2.5 units per year	Unclear method of evaluation of annual eGFR decline, but looks likely data only collected for 2003 and 2006, so likely to be slope estimated using only 2 eGFR measures (poor estimation likely to adversely affect prediction model)	outcome	N/A	primary outcome	GLMs	logistic regression	multivariate logistic regression for risk prediction model	3 years	3	The risk prediction model contained 7 readily obtainable variables and performed well predicting patients at high risk of progressive GFR decline in primary care	Partially acknowledged implications of sample completeness	Other imputation methods (to avoid exclusions)	Not mentioned	None	Not mentioned	None	Tackled methodologically or not an issue
Malgor RD et al [14]	A case-control study of intentional occlusion of accessory renal arteries during endovascular aortic aneurysm repair	Journal of Vascular Surgery	2013	1989-2009	2000-2009	USA	multiple care settings	INCLUDE in sub-analysis; not clear if EHRs used	No general details except study approved by IRB of the Mayo Clinic; Details specifically provided for BP measurements (hospital + primary care data sources)	abdominal aortic aneurysm (AAA)	abdominal aortic aneurysms (AAA) treated by endovascular abdominal aneurysm repair (EVAR)	75		0.92		risk factor identification / causal inference	to investigate association of presence of ARA and changes in eGFR (and other outcomes)	retrospective cohort study	not mentioned	at least 3 measures used to determine baseline eGFR, where possible	not mentioned	119	not mentioned	not available	not available	Numbers provided pre-exclusions for clinical criteria of study but not clear how many patients were excluded due to missing data.	eGFR	MDRD	absolute change in eGFR from baseline	absolute difference from baseline	none defined	none defined	despite defining reanl function detioration in methods, no results on this or evidence of evaluation; focus on change in eGFR compared by ANOVA	outcome	N/A	primary outcome	ANCOVA	ANCOVA	eGFR compared among cases and controls using ANCOVA; time point for evaluation of changes unclear	3.1 years	3.1	EVAR with ARA coverage carried no negative impact on renal function or blood pressure, even when applied to patients with more advanced stages of CKD	Mentioned care pathway and inclusion criteria but not sample completeness	None	Not mentioned	None	Not mentioned	None	Not mentioned
Brosnan EM et al [15]	Drug-induced reduction in estimated glomerular filtration rate in patients with ALK-positive non-small cell lung cancer treated with ALK inhibitor crizotinib	Cancer	2014	2009-2012	2010-2019	USA	not stated	INCLUDE; states EHRs used	electronic medical records in accordance with a University of Coloardo Instituional Review Board-approved protocol	lung cancer	stage IV ALK-positive non-small cell lung cancer treated with crizotinib	55	1	0.53		risk factor identification / causal inference	examining the effects of crizonitib therapy on eGFR in lung cancer patients	retrospective cohort study	not mentioned	not mentioned	38	38	not mentioned	1	not available	Results state 38 patients with cancer were identified. 38 patients were analysed and it is assumed 100% had data for analysis (mixed model). Patients stopping treatment were mentioned.	eGFR	CKD-EPI	regression slope of eGFR	piecewise linear mixed models	none defined	none defined	piecewise linear mixed model with knots at 2, 4, 6, 8 and 12 weeks; post-estimation of mean changes between baseline and each knot and between each consecutive knot with p-values;	outcome	N/A	primary outcome	mixed modelling methods	linear mixed model	piecewise linear mixed model with knots at 2, 4, 6, 8 and 12 weeks; post-estimation of mean changes between baseline and each knot and between each consecutive knot with p-values; additional subgroup analysis; main analysis does not adjust for confounding	12 weeks	0.25	eGFR is reduced by treatment with crizotinib, but the majority of patients will recover their eGFR after the cessation of therapy (suggesting reduction in eGFR may be pharmalogical effect rather than nephrotoxic effect)	Not mentioned	None	Mentioned care pathway follow up, but not losses to follow up	None	Mentioned care pathway follow up, but not data completeness	None	Not mentioned
Chase HS et al [16]	Presence of early CKD-related metabolic complications predict progression of stage 3 CKD: a case-controlled study	BMC Nephrology	2014	2006-2012	2000-2009	USA	primary care	INCLUDE; states EHRs used	primary healthcare electronic records from the Columbia University Medical Centre of the New York Presbyterian Hospital.	CKD	adults aged 21+ with CKD stage 3 (eGFR < 60 sustained over time, excluding persistent stage 4); cases: regression slope <-3; controls: regression slope -1 to 1	75		0.36	excluding ICD-9 codes for renal diseases known to cause renal function decline	risk prediction	to design a prediction model for CKD progression using laboratory values reflecting metabolic status	case control study	4	4+ creatinine measurements over at least 4 years	700	481	not mentioned	0.69	not available	~700 patients identified with confirmed stage 3 CKD; 481 patients analysed meeting progressor or non-progressor definitions after regression analysis in patients with 4+ measures over 4+ years	eGFR	MDRD	regression slope of eGFR	individual linear regression	progressors	eGFR slope decline > 3 units per year	binary progression outcome: progressors (slope <-3, and p<0.05 for slope of 0) vs non-progression (slope -1 to 1)	outcome	N/A	primary outcome	machine learning methods	Naïve Bayes classifier; logistic regression	case control design; t-tests to compare continuous markers at baseline and FU, chi-squared for categorical variables comparing P vs NP; logistic regression and Naïve Bayes classifiers to predict P vs NP, where P and NP defined based on linear regression slopes in individuals	Avg. 6 years (SD 2.9)	6	Patients who enter stage 3 CKD and ultimately progress to stage 4 manifest a greater degree of metabolic complications than those who remain stable. Certain lab values are associated with CKD progression. Naïve Bayes classifier predicts progression with 58% accuracy and predicts non-porgression with 22% accuracy. For logistic regression, 72% and 30%, respectively. ROC AUCs 0.73, 0.75 respectively.	Mentioned sample completeness but not implications	None	Not mentioned	None	Not mentioned	None	Partially acknowledged implications of data completeness
Chen H et al [17]	Combined application of eGFR and albuminuria for the precise diagnosis of stage 2 and 3a CKD in the elderly	Journal of Nephrology (Italy)	2014	2000-2012	2000-2009	China	hospital	INCLUDE in sub-analysis; not clear if EHRs used	inpatient and outpatient data from Beijing Friendship Hospital	CKD	elderly patients (aged >=65) diagnosed with stage 2 or 3a CKD	78		0.73		risk factor identification / causal inference	to confirm whether eGFR leads to over-diagnosis of CKD and to examine the utility of eGFR combined with albuminuria for diagnosising CKD stage 3a in the elderly	retrospective cohort study	3	inclusion required 3+ years of consecutive urinary albumin, urine volume, serum creatinine, and routine blood analysis (and stage 2 or 3a CKD)	not mentioned	365	0	not available	not relevant (complete case analysis)	patients did not drop out of analysis since complete data required for analysis, but many patients would not have been analysed (no data)	eGFR	CKD-EPI	Rate of percentage change in eGFR, not clearly defined	not stated	"rapid kidney function decline (RFKD)"	annual percentage decline >5%	no information on how annual percentage decline derived (3 eGFR measures over 3 consecutive years available)	outcome	N/A	primary outcome	GLMs	logistic regression	2 analyses: (1) comparison of means between baseline and year 3 (t-test), stratified by albuminuria category and baseline CKD stage; (2) logistic regression for rapid kidney function decline with multivariate adjustment	3 years	3	albuminuria is a strong predictor of renal porogress in the elderly, and the overdiagnosis of stage 3a CKD may exist in patients without albuminuria	Not mentioned	None	Not mentioned	None	Not mentioned	None	Not mentioned
Kose E et al [18]	Effects on serum uric acid by difference of the renal protective effects with atorvastatin and rosuvastatin in chronic kidney disease patients	Biological and pharmaceutical bulletin (Japan)	2014	2006-2011	2000-2009	Japan	outpatient	INCLUDE; states EHRs used	CKD outpatients in Yokosuka Kyousai Hospital from Nov-2006 to Oct-2011; information collected from medical records retrospectively; electronic medical records	CKD with hyperuricemia/hyperlipidemia	CKD stage 3 patients with hyperuricemia and hyperlipidemia complications and treated with ATV or ROS	66		0.59	excluding patients receiving a combination of drugs	risk factor identification / causal inference	to investigate the effects of atorvastatin (ATV) and rosuvastatin (ROS) on their renal protective effects in CKD patients	cross-sectional study	2	patients with eGFR data before treatment and three months after treatment	35	29	not mentioned	0.83	not relevant (complete case analysis)	"Among 35 [eligible] patients of CKD stage 3, we surveyed the 29 patients with data before and after the administration of statins"	eGFR	not specified	absolute change in eGFR from baseline	mean difference paired t-test	none defined	none defined	normality checks performed	outcome	N/A	primary outcome	simple statistical tests	mean difference paired t-test	5% significance level	3 months	0.25	Evidence of renal protective effects in stage 3 CKD patients with hyperuricemia and hyperlipidemia complications with ATV administration. No significant change in ROS patients.	Mentioned sample completeness but not implications	None	Not mentioned	None	Not mentioned	None	Not relevant (no covariate analysis)
Nderitu P et al [19]	Analgesia dose prescribing and estimated glomerular filtration rate decline: a general practice database linkage cohort study	BMJ Open	2014	2009-2010	2000-2009	UK	primary care	INCLUDE; states EHRs used	2 large general practices; a general practice database linkage cohort study	general population	patients aged 40+ with 2 eGFR 90 days apart	66		0.45		risk factor identification / causal inference	to investigate the effect of analgesia prescribing on eGFR decline	retrospective cohort study	2	aged 40+ AND 2 x eGFR separated by 90+ days between 1 Jan 2009 and 21 Dec 2010	13081	4145	not mentioned	0.32	not available	13,081 aged 40+; 4,145 2 valid eGFR measures; infomative flow diagram of inclusions shown	eGFR	MDRD	rate of change in eGFR	absolute difference in 2 eGFR measures divided by time elapsed	eGFR decline	change of >5 units per year between 2 measures (first, last)	only the first and last eGFR measures during the study period were used (follow up duration between 90 days to 2 years)	outcome	N/A	primary outcome	GLMs	logistic regression	logistic regression for fast/slow rate of decline, adjusted for baseline covariates	mean 270 days (9 months)	0.75	NSAID, aspirin and paracetamol prescribing over 2 years did not significantly affect eGFR decline with a reduced risk of eGFR decline in high-dose aspirin users with well-preserved renal function.	Partially acknowledged implications of sample completeness	None	Not mentioned	None	Mentioned data completeness, but not implications	None	Not mentioned
Oetjens M et al [20]	Utilization of an EMR-biorepository to identify the genetic predictors of calcineurin-inhibitor toxicity in heart transplant patients	Pacific Symposium of Biocomputing	2014	not stated	not stated	USA	outpatient	INCLUDE; states EHRs used	BioVU, Vanderbilt University Medical Center's DNA repository linked to electronic medical records; eligibility requires an outpatient lab blood draw	heart transplant recipients	heart transplant recipients prescribed CNIs; excludes eGFR < 30 (since outcome threshold)	53	1	0.66		risk factor identification / causal inference	to idenitfy genetic risk factors for CNI nephrotoxicity	retrospective cohort study	not mentioned	min number of measures not mentioned but data completeness was generally high, with avg 5 measures per pat per year	127	115	not mentioned	0.91	not available	127 heart transplant patients in database; 115 with DNA genotyped analysed; 25 died during follow up; not stated how many lost to follow up during intended follow up duration or what intended follow up duration was	eGFR	MDRD	binary progression to threshold eGFR	time to eGFR<30; monthly median eGFR < 30 at least 6 months post-transplant for at least 3 consecutive months	nephrotoxicity	monthly median eGFR <30 for 3 consecutive months		outcome	N/A	primary outcome	Cox PH regression	Cox PH regression	Cox PH regression for time to eGFR<30, adjsuted for age, CKD, diabetes and baseline eGFR (other variables were tested for univariate association but not included in final model as p>0.05); secondary analysis of linear mixed model of post-transplant eGFR	8.8 years	8.8	No SNP met the threshold for statistical significance, although suggestion of association for some SNPs to be investigated further	Not mentioned	None	Not mentioned	None	Partially acknowledged implications of data completeness	mixed modelling	Not mentioned
Annor FB et al [21]	Psychosocial stress and changes in estimated glomerular filtration rate among adults with diabetes mellitus	Kidney research and clinical practice	2015	2005-2008	2000-2009	USA	primary care	INCLUDE; states EHRs used	2005 survey data was used to capture the main exposure (psychosocial stress) and some other baseline characteristics; eGFR and other laboratory data captured from linkage to 4-year clinical and pharmacy records; other baseline data captured from primary care medical records	diabetes	working adults aged 25-59, diagnosed with DM but without advanced microvascular or macrovascular complications	50		0.41	only african american (black) and caucasian ethnicity included; 54% of study population were black	risk factor identification / causal inference	to examine the association between psychosocial stress and eGFR; to invetigate other predictors of eGFR changes	retrospective cohort study	none stated	Stated that "for eGFR measures, 49% had a measure on all 4 waves (years of FU) and 91% had a measure on at least 2 waves"; but not clear if all patients included or some excluded; multiple imputation used for missing data	not mentioned	575	not mentioned	not available	not available		eGFR	MDRD	regression slope of eGFR	growth model	decline in eGFR	eGFR slope decline > 0	MI to impute missing data; structural equation model with eGFR measured at 4 time points (calendar year); eGFR random slope variable specified representing annual rate of eGFR change	outcome	N/A	primary outcome	multiple imputation; structural equation modelling;	structural equation modelling	structural equation model with longitudinal eGFR measures "caused by" latent constructs (random eGFR intercept, random eGFR slope, latent variable for psycosocial stress), with adjustment for confounders (age, sex, race, education, SES, smoking, med use, MAP, etc)	4 years	4	no evidence of association between psychosocial stress variable and changes in eGFR; other predictors of eGFR changes were age, race, insulin use and mean arterial pressure	Partially acknowledged implications of sample completeness	multiple imputation	Not mentioned	None	Partially acknowledged implications of data completeness	multiple imputation	Partially acknowledged implications of data completeness
Chakera A et al [30]	Prognostic value of endocapillary hypercellularity in IgA nephropathy patients with no immunosuppression	Journal of Nephrology (Italy)	2015	not stated	not stated	UK	tertiary care	INCLUDE; states EHRs used	patients managed in a single tertiary unit (Oxford Kidney Unit); clinical and demographic data collected from electronic records	IgA nephropathy	patients with IgA nephropathy managed without (or with minimal) immuospressive therapy; excluding diabtes and henoch-schonlein purpura	40	1	0.76		risk factor identification / causal inference	to determine the impact of proliferative lesions on the natural history of IgAN	retrospective cohort study	not mentioned	not mentioned	237	147	not mentioned	not available	not available	237 adults identified with IgA nephropathy; 147 analysed after exclusions. Could not compute percent analysed as population criteria and data completeness criteria mixed up. [percent analysed not related to eGFR data; nothing about eGFR data mentioned]	eGFR	MDRD	rate of change in eGFR, not clearly defined	not stated	"rapid decline"	decline in eGFR >5 units per year	additional endpoint: time to ESRD (eGFR<15 or RRT)	outcome	N/A	primary outcome	GLMs	logistic regression	logistic regression for rapid decline, adjusted for covariates; (Cox regression for time to ESRD)	mean 7 years	7	endocapillary proliferation and tubular atrophy/ interstitial fibrosis are independent predictors of loss of renal function	Mentioned sample completeness but not implications	None	Not mentioned	None	Not mentioned	None	Not mentioned
Cid Ruzafa J et al [22]	Estimated glomerular filtration rate progression in UK primary care patients with type 2 diabetes and diabetic kidney disease: a retrospective cohort study	The international journal of clinical practice	2015	2006-2011	2000-2009	UK	primary care	INCLUDE; states EHRs used	Clinical Practice Research Datalink (CPRD) [data from 2006 selected due to QOF updates -> data availability]	diabetic kidney disease	patients with type 2 diabetes diagnosis and CKD diagnosis or renal function tests consistent with NICE/KDIGO-defined CKD (eGFR; albuminuria)	68		0.57		risk factor identification / causal inference	to examine factors associated with progression of diabetic kidney disease	retrospective cohort study	not mentioned	Require data for age, sex, 12 months of computerised records, albuminuria reported in md/dL, confirmation of CKD; for transitions between CKD stages, at least 2 eGFR required (assumed same for mixed model but not stated)	60867	15692	not mentioned	0.26	not available	60,867 patients with T2DM and presumed DKD; 15,692 patients analysed in longitudinal mixed model of eGFR (parsimonious model); Number of patients analysed depended on variables in model and data completeness; Only patients with ACR data included in statistical analysis.	eGFR	CKD-EPI	regression slope of eGFR	linear mixed model	none defined	none defined		outcome	N/A	primary outcome	mixed modelling methods	linear mixed model	mixed model in all patients and separate analyses by CKD stage; adjustment for baseline covariates, inlcuding some time-dependent covariates (time, age, albuminuria); inclusion of covariates in model required p<0.25 in univariate analysis	mean 3.7 years	3.7	Increased albuminuria and older age were the most consistent predictors of subsequent eGFR decline (slightly inaccurate interpretation of results, only adjusted at baseline and no interactions)	Partially acknowledged implications of sample completeness	None	Not mentioned	None	Not mentioned	None	Partially acknowledged implications of data completeness
Diggle PJ et al [23]	Real-time monitoring of progression towards renal failure in primary care patients	Biostatistics	2015	1997-2007+	2000-2009	UK	primary care	INCLUDE; states EHRs used	large sample of primary care patients; longitudinal cohort study run by Salford Royal Hospital Foundation Trust; SRFT dataset	at risk for CKD	unspecified risk factors for CKD	67	1	0.52		risk prediction	to develop a system for real-time monitoring of the progression of renal failure	retrospective cohort study	1	all patients had at least 1 creatinine measure; all patients were analysed	22910	22910	not mentioned	1	not available		eGFR	MDRD	predicted percent change in eGFR per unit time	linear mixed model	progression	Predicted decline >5% per year		outcome	N/A	primary outcome	mixed modelling methods	linear mixed model	modelling of eGFR over time, based on explanatory variables, random intercept and continuous time non-stationary stochastic process; derive predictive probabilities for meeting progression criteria for referral to secondary care; log-transformed eGFR; based on preliminary modelling, piecewise linear model for effect of age with change of slope at age 56	median 4.5 years	4.5	Probabilistic predictive inference linked to clinical criteria is a useful component of surveillance but should not dictate clinical decision-making	Mentioned sample completeness but not implications	None	Not mentioned	None	Mentioned data completeness, but not implications	mixed modelling	Partially acknowledged implications of data completeness
Johnson F et al [31]	The impact of acute kidney injury in diabetes mellitus	Nephrology (asian pacific)	2015	2009-2012	2010-2019	UK	multiple care settings	INCLUDE; states EHRs used	complete lab data covering the whole of a single NHS Health Board, linked to EHRs to collect clinical data (co-morbidity, recovery of renal function, mortality)	Diabetes	community-acquired and hosptital-acquired AKI in diabetic and non-diabetic patients	75		0.52		risk factor identification / causal inference	To investigate the impact of AKI on progressive renal dysfunction in diabetes, compared to non-diabetes	retrospective cohort study	not mentioned	Require KDIGO-defined AKI lab data (2xEGFR); Require post-AKI follow-up data for at least 6 months; definition of progression not clear - assume based on at least 2 values and may or may not not include baseline	493	200	not mentioned	0.41	not available	493 patients identified with diabetes/no-diabrtes and AKI; 200 eligible for long-term analysis of CKD progression requiring "follow up data available for at least 6 months" (assume just 1 measure needed any time 6 months post-AKI) [41% analysed overall, 69% of those alive at 3 months]	eGFR	not specified	rate of change in eGFR, not clearly defined	not stated	progressive chronic kidney disease	fall in eGFR > 5 units per year each year	Very confusing definition of progression, with no information on how derived - assumed absolute value between baseline and other measures post-baseline	outcome	N/A	secondary outcome	simple statistical tests	difference in proportions chi-squared test	Comparison of proportion developing progressive CKD in diabetes vs non-diabetes, chi-squared test; separate analysis for community-acquired and hospital-acquired AKI	(not clear); 6 months - 3 years	1.75	Diabetic patients experience less severe AKI which translates into better recovery and less progressive CKD (I dispute this conclusion, as may not account for confounding by testing)	Partially acknowledged implications of sample completeness	None	Not mentioned	None	Not mentioned	None	Not relevant (no covariate analysis)
Kaga M et al [24]	Risk of new-onset dyslipidemia after laparoscopic adrenalectomy in patient with primary aldosteronism	World Journal of Surgery	2015	1998-2013	2000-2009	Japan	hospital	INCLUDE in sub-analysis; not clear if EHRs used	Medical records from Chiba University Hospital; Medical records searched from Aug 1998 to March 2013	Primary aldosteronism (PA)	Japanese patients who underwent unilateral laparoscopic adrenalectomy (surgery) for primary aldosteronism (PA)	54	1	0.49		risk factor identification / causal inference	Secondary aim: assess changes in eGFR 12 months after surgery	retrospective cohort study	2	pre-operative and 12 months post-operative eGFR	not mentioned	57	not mentioned	not available	not relevant (complete case analysis)	Patients with incomplete data or follow up < 12 months were excluded from the study but no data provided pre-exclusions	eGFR	new formula developed in Japanese population	absolute change in eGFR from baseline	paired t-test	none defined	none defined	paired t-test, comparing baseline eGFR and eGFR 12 months after surgery (only before/after means presented, not changes from baseline)	outcome	N/A	secondary outcome	simple statistical tests	mean difference paired t-test	paired t-test, comparing baseline eGFR and eGFR 12 months after surgery; subgroups: with/without preoperative dyslipidemia; with/without posteroperative eGFR<60	1 year	1	A significant decrease in eGFR was identified 12 months postoperatively in most patients	Partially acknowledged implications of sample completeness	None	Not mentioned	None	Not mentioned	None	Not relevant (no covariate analysis)
Lai CL et al [25]	Effects of atorvastatin and rosuvastatin on renal function in patients with type 2 diabetes mellitus	American Journal of Cardiology	2015	2000-2010	2000-2009	Taiwan	multiple care settings	INCLUDE; states EHRs used	Taiwan National Health Insurance Pay-for-Performance program for diabetes mellitus database (2006-2009), linked to National Health Insurance claims database (2000-2010); 2 databases covering different data sources	type 2 diabetes	type 2 diabetic patients aged 40-100 newly prescribed statins; ethnic Chinese population	62		0.48		risk factor identification / causal inference	To investigate the effects of atorvastatin and rosuvastatin on renal function	retrospective cohort study	2	Excludes subjects without baseline serum creatinine and at least one follow up measure	76078	5569	not mentioned	0.07	not available	76,708 met pop criteria; 32,363 excluded due to missing baseline creatining; 38,146 excluded due to no follow up data; Min 1 follow up creat required for analysis; no info on how many and when patients dropped out	eGFR	MDRD	absolute change in eGFR from baseline	absolute change from baseline at most recent eGFR	none defined	none defined	Baseline eGFR compared to last available follow up eGFR.	outcome	N/A	primary outcome	multivariate linear regression	linear regression	Multiple linear regression, adjusting for confounders	Avg approx 7.5 months	0.65	Neither treatment with atorvastatin nor rosuvastatin was associated with a significant change of renal function in type 2 diabetes patients	Partially acknowledged implications of sample completeness	None	Not mentioned	None	Not mentioned	None	Not mentioned
Perotte A et al [26]	Risk prediction for chronic kidney disease progression using heterogeneous electronic health record data and time series analysis.	Journal of american medical informatics association	2015	up to 2012; approx 12 years prior follow up	2000-2009	USA	multiple care settings	INCLUDE; states EHRs used	clinical data warehouse for New York Presbyterian (NYP) hosptial; patients identified in outpatient primary care clinic; "heterogeneous sources of data"; longitudinal inpatient and outpatient	CKD	Incident CKD identified in an outpatient primary care clinic; excluding HIV and transplant patients	67		0.35	excluded patients entering dataset with biochemical CKD stage 3 already, HIV positive and transplant patients	risk prediction	Primary aim = risk prediction; Secondary aim = risk factor identification; Methodological proof of principle study that aims to use both discrete elements and narratives from EHR to develop a model that predicts CKD progression in individual patients	retrospective cohort study	2	All patients meeting definition for inclusion. (No other criteria mentioned.) Cohort entry required eGFR<60 confirmed over 3 monhts	2908	2908	not mentioned	1	not available	Looks like 100% of patients identified with incident CKD were analysed; for patients with missing data, imputation rules were used based on prior values if available (LOCF) or imputation of population mean; timeframe and data availability for evaluation of progression not stated (results state 342 progression events = 12% of cohort)	eGFR	CKD-EPI	binary progression to stage 4 CKD	2 x eGFR < 30, over >= 3 months	CKD progression from stage III to IV	binary progression to stage 4 (eGFR < 30 over >=3 months)	timeframe and data availability for evaluation of progression not stated (results state 342 progression events = 12% of cohort)	outcome	N/A	primary outcome	Latent variable methods; Cox PH regression	Kalman filter time series model; Cox PH regression	5 Cox proportional hazards models are presented: 2 simple; 3 2-step models based on pre-CKD time series models extracting patient latent factors for disease state at time developed CKD stage 3. Models: (1) baseline eGFR and demog; (2) 19 baseline labs and demog; (3) patient latent variables represengting history of 19 lab tests; (4) patient latent variables representing history of text used in pa…	not specified	not stated	A risk prediction model that takes longitudinal laboratory test results and longitudinal clinical documentation into consideration can statistically predict CKD progression from stage 3 to 4 more accurately than models that do not take all of these variables nor their longitudinal aspect into consideration.	Partially acknowledged implications of sample completeness	Other imputation methods (to avoid exclusions)	Not mentioned	None	Partially acknowledged implications of data completeness	LOCF; imputation with mean (main)	Partially acknowledged implications of data completeness
Singh A et al [27]	Incorporating temporal EHR data in predictive models for risk stratification of renal function deterioration	Journal of Biomedical Informatics	2015	not stated	not stated	USA	multiple care settings	INCLUDE; states EHRs used	EHR of Mount Sinai Medical Center	multiple CKD risk factors	mildly to moderately compromised kidney function (eGFR 45-90) as well as diagnoses of hypertension, diabetes or both	68		0.4		risk prediction	compare and develop models to identify patients at high risk of loss of kidney function over the next year	retrospective cohort study	4	at least 2 years of medical history on record AND median eGFR in the first year of the database of 45-90; 2 measures prior to baseline and 2 measures post-baseline	not mentioned	6435	not mentioned	not available	not available		eGFR	CKD-EPI	percent change in eGFR from baseline	percent drop in eGFR over 1 year (10% threshold; 20% threshold); percent change between median eGFR in 1-year before baseline and eGFR at 1 year	progression	2 progression thresholds: 10%; 20%		outcome	N/A	primary outcome	GLMs	logistic regression	logistic regression; various different approaches for incorporating data captured during different time intervals; all predictors transformed to binary variables; patients split into training and holdout (80/20 split)	not stated	not stated	Temporal eGFR data from EHRs can be used to predict loss of kidney function. Relative importance of different predictors varies over time. Multi-task learning based models can yield predictvie models with good performance.	Not mentioned	None	Not mentioned	None	Partially acknowledged implications of data completeness	LOCF	Partially acknowledged implications of data completeness
Vejakama P et al [28]	Epidemiological study of chronic kidney disease progression: a large-scale population-based cohort study	Medicine	2015	1997-2011	2000-2009	Thailand	multiple care settings	INCLUDE; states EHRs used	linkage of community health screening, hospitals and death registry data; includes out and in patients	CKD	CKD diagnosed by KDIGO criteria, based on GFR and albuminuria	63		0.36		risk factor identification / causal inference	to estimate CKD progression risk with comparisons by risk factors	retrospective cohort study	not mentioned	diagnosed with CKD and at least 3 months follow up (but assume based on end of study date rather than eGFR measure)	not mentioned	32106	not mentioned	not available	not available	32106 patients identified with CKD based on eGFR and albuminuria; not stated how many excluded if less than 3 months of follow up	eGFR	CKD-EPI	percent change in eGFR from baseline	change in eGFR category with 25% or greater drop in eGFR from baseline	CKD progression	change of eGFR category with 25% or greater drop in eGFR from baseline		outcome	N/A	primary outcome	competing risks survival models	competing risks survival models	Analysis of time from CKD diagnosis to CKD progression or death, with censoring at end of follow up (Dec 2011); death treated as competing risk; time to CKD progression compared by diabetes status; GFR category as time-changing covariate; adjustments for baseline characteristics	4.5 years	4.5	Diabetes, hypertension, CVD and albuminuria all increased the risk of CKD progression but BMI reduced the risk (not well explained)	Partially acknowledged implications of sample completeness	None	Tackled methodologically	competing risks survival models	Mentioned care pathway follow up, but not data completeness	None	Tackled methodologically or not an issue
Yun WS et al [29]	Long-term follow up results of acute renal embolism after anticoagulation therapy	Annals of vascular surgery	2015	2006-2012	2000-2009	South Korea	not stated	INCLUDE in sub-analysis; not clear if EHRs used		acute renal embolism (ARE)	patients diagnosed with ARE by computed tomography (CT)	61		0.51		descriptive characterisation of changes in renal function	to investigate the clinical manifestations and long-term follow-up results of ARE	retrospective cohort study	2	not stated but reasonable to assume 2 measures (baseline + FU)	47	31	not mentioned	0.66	not available	47 patients meeting diagnosis criteria were enrolled; 31 patients had follow up creatinine; some LTFU data available but not specifically for patients analysed	serum creatinine	N/A	absolute change in serum creatinine	absolute change in serum creatinine	none defined	none defined		outcome	N/A	secondary outcome	descriptive results only	descriptive result only; no statistical analysis	Change in serum creatinine level was summarised if follow up data were available	2.6 years	2.6	Renal function did not deteriorate during the measn follow up period. Mean change in serum creatinine level was 0.2 (-2.2 to 3.2) during the mean period of 31 months	Fully acknowledged implications of sample completeness	None	Mentioned losses to follow up but not implications	None	Not mentioned	None	Not relevant (no covariate analysis)
Kim YG et al [32]	Renal protective effect of DPP-4 inhibitors in type 2 diabetes mellitus patients: a cohort study	Journal of Diabetes Research	2016	2010-2015	2010-2019	South Korea	tertiary care	INCLUDE; states EHRs used	clinical database of Ajou University Hospital, a tertiary hospital	Diabetes	Type 2 diabetes (ICD-10 E11) prescribed DPP-4i	59		0.54		risk factor identification / causal inference	To determine the renoprotective effects of DPP-4i (oral antidiabetic drugs)	retrospective cohort study	3	urine albumin and creatinine at baseline, 1 year pre-meds and 1 year post-med initiation; (additional analysis at 4 years)	not mentioned	414	not mentioned	not available	not relevant (complete case analysis)	414 analysed; no data pre-exclusions (78 patients in 4 year analysis after 4 years treatment)	eGFR	MDRD	absolute change in eGFR from baseline	paired t-test (of 2 x changes in eGFR)	none defined	none defined	Changes in year before treatment compared to changes in first year of treatment (paired t-test for difference in CHANGES)	outcome	N/A	secondary outcome	simple statistical tests	mean difference paired t-test	eGFR changes compared before and after treatment with paired t-test at 1 year (main analysis) and at 4 years (secondary analysis); 4 year analysis stratified by level of proteinuria (normo, macro, micro)	2 years	2	(1) eGFR was not changed 1 year after treatment compared with 1 year before treatment; (2) [other analysis]: Administration of DPP-4i reduces urine albumin excretion and mitigates reduction of eGFR in T2DM patients	Not mentioned	None	Not mentioned	None	Not mentioned	None	Not relevant (no covariate analysis)
Li XM et al [33]	Clinicopathological characteristics and outcomes of light chain deposition disease: an analysis of 48 patients in a single Chinese center	Annals of Hematology	2016	2004-2015	2000-2009	China	hospital	INCLUDE in sub-analysis; not clear if EHRs used	single center study; National Clinical Research Center of Kidney Diseases, Jinling hospital; unlikely EHRs	light chain deposition disease (LCDD)	biopsy-proven light chain deposition disease (LCDD), a disorder which usually affects the kidneys	51		0.6	Chinese, non-Caucasian	risk factor identification / causal inference	to identify risk factors for ESRD	retrospective cohort study	not mentioned	ESRD main outcome (may not require creat data); unclear what creat data required at baseline	48	44	not mentioned	0.92	not available	48 patients identified with LCDD; 44 patients "with clinical follow up" analysed but not clear criteria used for duration of follow up	serum creatinine	N/A	binary progression to threshold serum creatinine	time to ESRD; ESRD = SCr>6 mg/DL or RRT initiation	worsening renal function	>50% increase from baseline in SCr but less than 6 mg/dL	2 renal function outcomes: worsening renal function and progression to ESRD; analysis focus on time to ESRD so choose this as main renal outcome	outcome	N/A	secondary outcome	Cox PH regression	Cox PH regression	Univariate and multivariate Cox regression models for time to ESRD; looks like 5 pre-specified variables included in models (includes biomarkers and treatment, no demographic variables); additional ROC analysis dichotomosing key predictor variables (SCr, urinary retinol-binding protein)	average 1.8 years	1.8	In addition to serum creatinine, urinary retinol-binding protein was an independent risk factor for progression to ESRD	Partially acknowledged implications of sample completeness	None	Not mentioned	None	Not mentioned	None	Partially acknowledged implications of data completeness
Mirajkar N et al [34]	The impact of bariatric surgery on estimated glomerular filtration rate in patients with type 2 diabetes: a retrospective cohort study	Surgery for Obesity and Related Diseases	2016	2005-2012	2000-2009	UK	outpatient diabetes	INCLUDE; states EHRs used	electronic patient records; university hospital, patients undergoing surgery and attending diabetes clinic	type 2 diabetes		53		0.47		risk factor identification / causal inference	to investigate the impact of bariatric surgery in type 2 diabetes on eGFR	retrospective cohort study	2	patients included with baseline eGFR and another value during follow up	790	388	not mentioned	0.49	not available	565 patients met surgery criteria, of which 163 had baseline and FU eGFR and included in analysis; a further 225 patients were included as comparison group (which used data from a prospective study); assume complete data in the comparison group as no suggestion otherwise	eGFR	MDRD	absolute change in eGFR from baseline	calculated based on 2 measures	none defined	none defined		outcome	N/A	primary outcome	simple statistical tests	simple non-parametric tests (Mann Whitney U)	Final eGFR analysed by linear regression, main exposure bariatric surgery, adjusting for age, baseline eGFR, baseline HbA1c, baseline BMI, HbA1c change, BMI change and follow up duration; subgroup analysis by baseline eGFR and type of surgical procedure	3.0 years	3	Bariatric surgery results in significant improvements in eGFR in T2D patients, particularly those with eGFR<60, while routine care was associated with a decline in eGFR	Partially acknowledged implications of sample completeness	None	Partially acknowledged implications of losses to follow up	None	Not mentioned	None	Partially acknowledged implications of data completeness
Koraishy FM et al [35]	Rate of renal function decline, race and referral to nephrology in a large cohort of primary care patients	Family practice	2017	2008-2015	2010-2019	USA	primary care	INCLUDE; states EHRs used	electronic healthcare record data from primary care clinics	general population	all patients from primary care database with 2 x eGFR over 7-year period	60		0.34	black and white primary care adults only	risk factor identification / causal inference	To determine if rate of CKD progression was associated with referral and if race disparities in referral exist according to rate of CKD progression	cross-sectional study	2	at least 2 x eGFR at any time over the 7-year observation period	31569	2170	not mentioned	0.07	not available	29490 patients meeting population criteria (age 18+, race black or white); 2268 with 2 x eGFR; 2170 after exclusions for ESRD or missing demographic data	eGFR	MDRD and CKD-EPI (multiple labs used)	rate of change in eGFR	difference between consecutive measures only, divided by time elapsed	Fast CKD progression	decline in eGFR >= 5 units per year, for any pairwise comparison of eGFR measures	Each pair of consecutive eGFR measures for a patient was used to compute the rate of change in eGFR per year; if a patient had any rate < - 5 units per year, they were considered fast progressors and otherwise slow progressors	exposure	nephrology referral	primary exposure	GLMs	logistic regression	Logistic regression for nehrology referral, separate unadjusted models for each covariate and adjusted models including eGFR progression, race and all covariates; test for interaction between race and eGFR progression	not stated	not stated	Fast CKD progression and black ethnicity were independently associated with increased odds of nephrology referral; no evidence of interaction between CKD progression and race. However, a large majority of fast progressors were not referred.	Mentioned sample completeness but not implications	None	Not mentioned	None	Not mentioned	None	Tackled methodologically or not an issue
Lv L et al [36]	Persistent hematuria in patients with antineutrophil cytoplasmic antibody-associated vasculitis during clinical remission: chronic glomerular lesion or low-grade active renal vasculitis?	BMC Nephrology	2017	1996-2016	2000-2009	China	hospital	INCLUDE in sub-analysis; not clear if EHRs used	Renal Division, Peking University First Hospital; retrospective analysis	Antineutrophil cytoplasmic antibody (ANCA)-associated vasculitis (AAV)	newly diagnosed AAV	59		0.41		risk factor identification / causal inference	to identify risk factors for renal outcome, and specifically the association of persistent hematuria	retrospective cohort study	not mentioned	assume 2 creat values required for analysis	219	208	not mentioned	0.95	not available	11 patients excluded due to not meeting exposure criteria	eGFR	not specified	rate of change in eGFR	final eGFR minus baseline eGFR, divided by time elapsed	end-point of renal survival	doubling in serum creatinine or halving of eGFR compared to baseline	renal outcome used for Cox reg analysis	outcome	N/A	primary outcome	Cox PH regression	Cox PH regression	multivariate Cox PH regression of renal outcome	median 3.1 years	3.1	Slope of decline in eGFR was significantly higher in patients with persistent hematuria and persistent hematuria was an independent risk factor for renal outcome in multivariate analysis	Not mentioned	None	Not mentioned	None	Not mentioned	None	Not mentioned
Nishida Y et al [37]	Comparative effect of calcium channel blockers on glomerular function in hypertensive patients with diabetes mellitus	Drugs in R&D	2017	2004-2012	2000-2009	Japan	hospital	INCLUDE; states EHRs used	3 hospitals in Japan; inlcudes linked data for prescriptions, demographics, lab data, diagnoses	diabetes	diabetes and hypertension	66		0.57		risk factor identification / causal inference	to study effect of drugs on longitudinal eGFR for up to 12 months after initation	retrospective cohort study	not mentioned	5 timepoints studied, not clear how much data required for analysis	not available	1217	not mentioned	not available	not available	some numbers provided but can not differentiate between failure to meet population criteria and insufficient data for analysis	eGFR	Japanese Society of Nephrology formula	percent change in eGFR from baseline	percent change between baseline eGFR and exposure period eGFR measures (every 3 months, max 12 months)	none defined	none defined		outcome	N/A	primary outcome	mixed modelling methods	linear mixed model	multivariate linear mixed model with compound symmetry, with observations grouped into time periods every 3 months up to 12 months, analysing effect of treatment group and treatment duration on eGFR; post-hoc multiple comparison test to compare least squares means among 5 treatment groups	12 months	1	Monotherapy with calcium channel blockers may have little influence on renal function and may be safely used in hypertensive patients with diabetes	Partially acknowledged implications of sample completeness	None	Not mentioned	None	Tackled methodologically	mixed modelling	Partially acknowledged implications of data completeness
Rincon-Choles H et al [38]	Impact of uric acid levels on kidney disease progression	American journal of nephrology	2017	2005-2009	2000-2009	USA	outpatient	INCLUDE; states EHRs used	Cleveland Clinic CKD registry; a large EHR-based CKD registry	CKD	CKD stages 3-4	68		0.58		risk factor identification / causal inference	to assess the association between uric acid (UA), UA-lowering therapy (UALT) and renal outcomes	retrospective cohort study	3	2 x eGFR<60 over 90+ days plus at least one follow up eGFR; at least one outpatient UA within year prior to 2nd eGFR confirming CKD	29475	1676	not mentioned	0.06	not available	38954 patients ahd eGFR 15-59; 29475 after exclusion for malignancy; 1947 after exclusion for missing UA; 1676 after exclusion for no follow-up eGFR	eGFR	CKD-EPI	Binary progression (eGFR changes/threshold combination)	(time to) 50% drop in eGFR or progression to ESRD; time since 2nd eGFR result confirming CKD (assume each follow up eGFR compared to 2nd eGFR, but not specified)	CKD progression	50% drop in eGFR or ESRD		outcome	N/A	primary outcome	competing risks survival models	competing risks survival models	Cox models and competing risks models; multivariate adjsutment; death as competing risk; time-updated UALT; secondary analyses with linear mixed model of eGFR; mean value imputation for missing covariate data	median 2.8 years	2.8	Hyperuricemia is associated with increased risk of progression to ESRD in CKD stages 3-4, but UALT does not ameliorate the risk, suggesting that the relationship is not causal	Partially acknowledged implications of sample completeness	None	Tackled methodologically	competing risks survival models	Not mentioned	None	Tackled methodologically or not an issue
Tsai CW et al [39]	Serum Uric Acid and Progression of Kidney Disease: A Longitudinal Analysis and Mini-Review.	Plos one	2017	2003-2011	2000-2009	Taiwan	tertiary care	INCLUDE; states EHRs used	electronic medical records from a tertiary medical centre in Taiwan	hyperuricemia	Chinese patients with hyperucricemia	63		0.6	excluded patients with dialysis/transplant within 30 days of baseline	risk factor identification / causal inference	investigating the association between uric acid levels and CKD progression	retrospective cohort study	3	>= 3 serum creatinine measures between 2003 to 2011; no RRT within 30 days of baseline	not mentioned	739	not mentioned	not available	not available	number of patients diagnosed hyperuricemia in medical centre EHR not provided; number analysed = 739; LTFU not mentioned	eGFR	MDRD	regression slope of eGFR	linear mixed model	progression to ESRD	eGFR<15 or dialysis	eGFR slope (linear mixed model)	outcome	N/A	primary outcome	mixed modelling methods	linear mixed model	(1) adjusted linear mixed model investigating association between uric acid at baseline and longitudinal eGFR; (2) adjusted cox PH model for associatino between UA level and eGFR<15/dialysis/transplant	mean 4.25 years	4.25	A higher uric acid level is associated with a significant rapid decline in eGFR, particularly in patients with proteinuria.	Not mentioned	None	Not mentioned	None	Not mentioned	mixed modelling	Not mentioned
Yao X et al [40]	Renal outcomes in anticoagulated patients with atrial fibrillation	Journal of the American College of Cardiology	2017	2010-2016	2010-2019	USA	not stated	INCLUDE; states EHRs used	a large US administrative database linked to lab results; Optum-Labs Data Warehouse; private and Medicare patients of all ages and races throughout USA; "diverse clinical practice settings" but not clarified what they were	atrial fibrillation	patients with non-valvular AF who started taking oral anticoagulants (new users)	73		0.55		risk factor identification / causal inference	to study the impact of oral anticoagulants on renal outcomes	retrospective cohort study	2	creatinine at baseline and follow up	not mentioned	9769	not mentioned	not available	not available		eGFR	CKD-EPI	percent change in eGFR from baseline	percent change between baseline and each follow up eGFR measure	decline	30% decline in eGFR during follow up		outcome	N/A	primary outcome	Cox PH regression	Cox PH regression	Cox PH regression comparing different drugs for renal outcomes; main outcome was 30% decline in eGFR; other outcomes were creatinine doubling, AKI and kidney failure; inverse probability weighting was used to balance 60 baseline characteristics; model included date of treatment initiation to account for variable follow up bias	11 months	0.9	non-vitamin K antagonist oral anticoagulatnts (NOACs), particularly dabigatran and rivaroxoban may be associated with lower risks of adverse renal outcomes than warfarin	Partially acknowledged implications of sample completeness	None	Tackled methodologically	competing risks survival models	Partially acknowledged implications of data completeness	None	Partially acknowledged implications of data completeness
Beyer-Westendorf J et al [41]	The CHA2DS2VASc score strongly correlates with glomerular filtration rate and predicts renal function decline over time in elderly patients with atrial fibrillation and chronic kidney disease	International Journal of Cardiology	2018	2008-2015	2010-2019	multiple European countries	primary care	INCLUDE; states EHRs used	2 primary care EHR cohorts: (1) IMS-DA Germany; (2) IMS-THIN UK	atrial fibrillation	patients with atrial fibrillation and CKD; patients with concurrent diagnosis of AF and CKD stages 3-4 between 1 Jan 2008 to 31 Aug 2015 identified by ICD-10 codes; CKD checked by eGFR<60	79		0.48		risk factor identification / causal inference	It is borderline whether this analysis represents risk factor identification and causal inference or risk prediction; however no new risk prediction model is generated and it seems more about causal inference or the utility of CHA risk prediction score for eGFR decline prediction	retrospective cohort study	1	at least one eGFR at or after baseline (diagnosis)	not available	36779	not mentioned	53% German data; not available UK data	not available	IMS-DA (Germany): 34,859 pts met diagnosis criteria; 19,192 of these had at least one eGFR at or after baseline; 18,539 qualified for analysis after excluding those previously diagnosed CKD stage 5, RRT or missing CHA2DS2VASc score and implausible eGFR values dropped; IMS-THIN (UK): 20,780 pts met diagnosis criteria after exclusions performed by data provider (no pre-exclusion figrues provided); …	eGFR	CKD-EPI	regression slope of eGFR	linear mixed model	none defined	none defined	CKD-EPI used if eGFR not available from ERH but creatinine available	outcome	N/A	primary outcome	joint modelling	joint longitudinal survival model	IMS-DA: straight-forward linear mixed model (no death data available); IMS:THIN: joint longitudinal survival model adjusting for drop out due to death; BOTH models: fixed effects for polynomial time to allow non-linear trajectories over time plus random intercept and slope for eGFR to allow patient-specific baseline and trajectory; eGFR modelled on log-scale for interpretability of results as per…	median ~1.7 years	1.7	Increasing CHA2DS2VASc score is associated with lower baseline eGFR and predicts steeper decline in eGFR over time	Partially acknowledged implications of sample completeness	None	Tackled methodologically	Joint modelling of longitudinal changes and time to drop out	Tackled methodologically	mixed modelling	Not mentioned
Butt AA et al [42]	Effectiveness, treatment completion and safety of sofosbuvir/ledipasvir and paritaprevir/ritonavir/ombitasvir + dasabuvir in patients with chronic kidney disease: an ERCHVIES study	Alimentary pharmacology & therapeutics	2018	2014-2016	2010-2019	USA	multiple care settings	INCLUDE; states EHRs used	the Electronically Retrieved Cohort of HCV Infected Veterans (ERCHIVES), a well-established national cohort of HCV-infected persons with age-sex-race-matched controls	hepatitis C virus	patients with hepatitis C virus (HCV) and CKD, treated with HCV drugs [note: not all have eGFR<60]	62	1	0.97		risk factor identification / causal inference	to determine efficacy, safety and tolerability of HCV treatment in CKD population (w.r.t. eGFR decline)	retrospective cohort study	3	at least 2 eGFR 3 or more months apart at baseline, and eGFR estimations >= 12 weeks after therapy	37481	17624	7683	not available	0.44	Could not compute percent analysed as population criteria and data completeness criteria mixed up. Note: number dropped out derived based on a table of number of patients with eGFR data at 3 months (12 weeks) [N=9941]	eGFR	CKD-EPI	absolute change in eGFR from baseline	absolute change from baseline calculated at any follow up time up to 12 weeks	"progression"	> 10 unit decline in eGFR from baseline at any time during follow up	analysis stratified by treatment group and baseline CKD stage	outcome	N/A	primary outcome	simple statistical tests	difference in proportions chi-squared test	Summary of proportion of patients who experienced a >10 unit eGFR decline at any time during follow up, stratified by treatment group and CKD stage	12 weeks	0.25	A decline in eGFR was observed in a substantial proportion of CKD patients.	Mentioned sample completeness but not implications	None	Mentioned losses to follow up but not implications	None	Mentioned data completeness, but not implications	None	Not relevant (no covariate analysis)
Evans RDR et al [46]	Clinical manifestations and long-term outcomes of IgG4-related kidney and retroperitoneal involvement in a United Kingdom IgG4-related disease cohort	Kidney International Reports	2018	2002-2018	2010-2019	UK	tertiary care	INCLUDE in sub-analysis; not clear if EHRs used	London-Oxford database of IgG4-RD patients and further review of medical records	IgG4-related disease with renal or retroperitoneal involvement	adults with a diagnosis of IgG4-RD between 2002 to 2018	58		0.93		estimation of incidence/ prevalence	to describe the clinical characteristics and outcomes of renal and retroperitoneal involvement in a cohort of IgG4-RD patients from the UK	retrospective cohort study	2	2 x eGFR, at presentation and during follow up	28	24	0	0.86	not relevant (complete case analysis)	Complete data required for analysis; 4 patients excluded from outomce analysis due to incomplete followup	eGFR	MDRD	percent change in eGFR from baseline	percent change between baseline and latest eGFR	progressive renal impairment	>15% reduction from baseline	MDRD unadjusted for ethnicity	outcome	N/A	secondary outcome	descriptive results only	crude estimation / descriptive results only	Prevalence of progressive renal impairment described overall and compared by use of immunosuppression, no p-value given but very small numbers	mean 5 years	5	Renal function detiorated in 5 patients (20.8%), including 2 (8.3%) who reached ESRD; Major organ manifestations of IgG4-RD should be identified early with prompt treatment to prevent progression to ESRD	Partially acknowledged implications of sample completeness	None	Mentioned losses to follow up but not implications	None	Not mentioned	None	Not relevant (no covariate analysis)
Lamacchia O et al [43]	Normoalbuminuria kidney impairment in patients with T1DM: insights from annals initiative	Diabetology & Metabolic Syndrome	2018	2004-2011	2000-2009	Italy	outpatient diabetes	INCLUDE; states EHRs used	electronic medical records; patients attending diabetes clinics; Italian Association of Clinical Diabetologists database designed to monitor diabetes quality of care	diabetic kidney disease	type 1 diabetes and eGFR <60	63		0.47	covering one third of Italian diabetes clinics and deemed representative	risk factor identification / causal inference	investigating the role of albuminuria in kidney disease progression	retrospective cohort study	2	at least one outpatient measurement of serum creatinine and albuminuria at baseline (any time, may vary by patient) and a re-evaluation of eGFR 4 years later	1395	582	not mentioned	0.42	not available	1395 patients with T1DM extracted with at least 1 outpatient serum creatinine and albuminuria measure; subgroup of 582 with 4 years follow up analysed for CKD progression	eGFR	CKD-EPI	percent change in eGFR from baseline	percent eGFR change from baseline at 4 years	Loss of eGFR >30%	eGFR reduction >30% from baseline (at 4 years)	Analysis focused on percent change between 2 measures over 4 years; supplementary analysis estimated absolute changes over time using individual linear regression	outcome	N/A	primary outcome	GLMs	logistic regression	Logistic regression comparing loss of eGFR>30% at 4 years comparing albuminuria categories at baseline, with adjustment of selected covariates with p<0.05, including age and gender (complete case analysis but sample size not stated)	4 years	4	Patients with normoalbuminuria have a slower eGFR decline than those with albuminuria	Partially acknowledged implications of sample completeness	None	Not mentioned	None	Not mentioned	None	Not mentioned
Park JM et al [56]	Oncological and functional outcomes of laparoscopic radiofrequency ablation and partial nephrectomy for T1a renal masses: a retrospecive single-center 60 month follow up cohort study	Urological oncology	2018	2005-2014	2010-2019	South Korea	hospital	INCLUDE in sub-analysis; not clear if EHRs used	Chungnam National University Hospital; perioperative and postoperative data	renal cancer	all consecutive patients undergoing RFA or PN in 2005-2014	56		0.74		risk factor identification / causal inference	to compare renal function outcomes of laparoscopic radiofrequency ablation (RFA) and partial nephrectomy (PN) for cT1a renal masses	retrospective cohort study	not mentioned	patients included if "min 2 years follow up" but unclear what data required at baseline and follow up	not available	115	not mentioned	not available	not available	Reasons for exclusion stated but not clear how many excluded and for what reasons; inclusion requires min 2 years follow up; not clear how many patients dropped out after 2 years or why	eGFR	not specified	absolute change in eGFR from baseline	absolute difference between baseline eGFR and last follow up measure	none defined	none defined		outcome	N/A	primary outcome	simple statistical tests	difference in means t-test	two sample t-test used comparing change in eGFR by treatment group	5.3 years	5.3	The treatment groups did not differ in terms of short-term and long-term changes in eGFR post-surgery	Partially acknowledged implications of sample completeness	None	Not mentioned	None	Not mentioned	None	Not relevant (no covariate analysis)
VanWagner LB et al [44]	Cardiovascular disease outcomes related to early stage renal impairment following liver transplantation	Transplantation	2018	2002-2012	2000-2009	USA	multiple care settings	INCLUDE; states EHRs used	local and national LT patient cohorts; includes outpatient and inpatient data; Vizient hospitalisation data linked to United Network for Organ Sharing	liver transplant patients	adults undergoing liver transplant from Feb 2002 to Dec 2011, with follow up to 2012	56		0.66	note: population features based on local cohort analysis of 671 patients (used for trajectory analysis)	identification of sub-populations AND risk factor identification / causal inference	(1) to characterise subgroups of eGFR trajectories; (2) to determine association between eGFR trajectory and CV complications	retrospective cohort study	3	3+ eGFR within 1 year of liver transplant	not mentioned	671	not mentioned	not available	not available	671 pts with 3+ eGFR within 1 year of LT	eGFR	MDRD	eGFR trajectory group	Latent mixture modelling	6 categories defined: normal-slow decrease; normal rapid decrease; mild stable; mild slow decrease; moderate stable; severe stable	(trajectory shape)		exposure (and outcome)	composite CV event	primary exposure	latent variable methods	trajectory clustering using latent variables	2-step modelling process: (1) LCMM for eGFR trajectory group; (2) logistic regression for CV risk, given eGFR trajectory group [no joint modelling of drop out mentioned]	1 year	1	6 distinct eGFR trajectories were identified; greatest odds of 1-year CV complications were in the normal-rapid decrease group; more rapid declines in eGFR soon after liver transplant correlate with risk of adverse CV outcomes	Not mentioned	None	Partially acknowledged implications of losses to follow up	Sensitivity analysis in drop-out for RRT	Tackled methodologically	mixed modelling	Not mentioned
Viazzi F et al [45]	Apparent treatment resistent hypertension, blood pressure control and the progression of chronic kidney disease in patients with type 2 diabetes	Kidney & Blood pressure research	2018	2004-2011	2000-2009	Italy	outpatient diabetes	INCLUDE; states EHRs used	EHRs; 90 diabetes centers with close patient follow up	type 2 diabetes	patients with type 2 diabetes and hypertension and stage 3 CKD (eGFR 30-690 at baseline)	73		0.5		risk factor identification / causal inference	to assess the role of apparent treatment resistent hypertension (aTRH) and time-updated BP control on progression of CKD	retrospective cohort study	6	2 baseline eGFR measures + annual evaluation for 4 years; requiring complete data for BP, eGFR and albuminuria (in line with treatment protocols)	6999	2312	not mentioned	0.33	not relevant (complete case analysis)	6999 met study pop criteria; exclusions for missing data; 2312 analysed for renal outcomes (Table 5) with complete data over 4 years	eGFR	CKD-EPI	percent change in eGFR from baseline	binary 30% reduction in eGFR from baseline at any time over 4 years (mixed models also performed separately)	eGFR loss	30% eGFR reduction from baseline		outcome	N/A	primary outcome	mixed modelling methods	logistic regression	A little confusing but looks like main analysis is 30% change from baseline at any time, analysed by mixed logistic regression with multivariate adjustment (Table 5). Random effects for clinic; complete case analysis with multivariate adjustment. Additional linear mixed models performed for changes over time in eGFR.	4 years	4	In patients with stage 3 CKD the presence of aTRH entails a faster loss of eGFR. More effective prevention of aTRH should be implemented as this condition is associated with a burden of risk not modifiable by tight BP reduction	Mentioned sample completeness but not implications	None	Mentioned care pathway follow up, but not losses to follow up	None	Mentioned care pathway follow up, but not data completeness	None	Not mentioned
Horne L et al [47]	Epidemiology and health outcomes associated with hyperkalemia in a primary care setting in England	BMC Nephrology	2019	2009-2013	2010-2019	UK	primary care	INCLUDE; states EHRs used	Clinical Practice Research Datalink (CPRD), Hospital Episode Statistics (HES) and Office for National Statistics (ONS)	Hyperkalemia (HK)	adults with a HK event between 2009-2013, with at least 1 year follow up post event and with at least 1 visit to GP within the year	61		0.48		estimation of incidence/ prevalence	Note: evaluation of renal function secondary analysis; estimation of incidence of kidney function decline in patients with HK event, overall and by subgroup	retrospective cohort study	not mentioned	difficult to make assumption here; could be no measure since renal decline not focus; could be 1 measure (baseline)	not mentioned	195178	not mentioned	not available	not available	"195,178 with an index HK event analysed"; not clear how many had renal function data during follow up, if all made it into renal function analysis and how many LTFU or why	eGFR	MDRD	transition to CKD stage	not stated ("decline from baseline CKD stage")	declining kidney function	"presence of diagnostic codes and/or eGFR showing a decline from baseline CKD stage"	assume any eGFR during follow up in a CKD stage lower than that at baseline considered "declining kidney function" but this was not clear	outcome	N/A	secondary outcome	Descriptive results only	Crude estimation / descriptive results only	Crude incidence rates of "declining kidney function" summarised overall and by subgroup for patients with a HK event; no analysis except crude incidence rate and 95% CI	not stated	not stated	Higher rates of renal function decline were observed among those with more severe index HK	Not mentioned	None	Not mentioned	None	Not mentioned	None	Not relevant (no covariate analysis)
Hsu TW et al [48]	Comparison of the effects of dsnosumab and alendronate on cardiovascular and renal outcomes in osteoporotic patients	Journal of clinical medicine	2019	2005-2017	2010-2019	Taiwan	multiple care settings	INCLUDE; states EHRs used	Chang Gung Research Database (CGRD) EHR dataset, containing diagnosis, prescription, laboratory tests in emergengy, inpatient and outpatient settings.	Osteoporosis	adults age 20-89 at time of initiation of denosumab or alendronate between 2005-2017, excluding history of RRT, MI/CHF/Stroke/CABG/PCI and cancer.	71		0.17		risk factor identification / causal inference	To investigate whether denosumab may play a role in reducing CV events and renal function progression	retrospective cohort study	2	at least 1 year admission records before treatment initiation, a baseline and follow up value for serum creatinine	not mentioned	5046	not mentioned	not available	not available	Flow chart provided with exclusions, but not possible to compute percentage analysed from this since other population and analysis criteria applied after data availability critieria; As a guide, 57% of all patients treated with study drugs (before other exclusions) met eGFR exclusion critieria. Note, further exclusions due to propensity score matching.	eGFR	MDRD	percent change in eGFR from baseline	percent change between baseline and each eGFR measure	renal function decline	eGFR decline >= 30% from baseline	Text states eGFR was assessed every 6 months - it is not clear how many patients had missing data in each 6 month period over the maximum of 5 years follow up	outcome	N/A	secondary outcome	Cox PH regression	Cox PH regression	Adjusted Cox PH regression for eGFR decline >= 30% from baseline, where eGFR was assessed every 6 months over max 5 year period. Reasons for censoring were death, loss to follow up, treatment change or latest date in dataset. Unclear how LTFU defined and data completeness for eGFR. Cohort propensity score matched at baseline (leading to smaller sample size). 7 x stratified analysis by subgroups. …	max 5 years	5	Denosumab may exert cardiovascular benefits but may have renal disadvantages in certain conditions and must be used with caution. Denosumab was associated with increased risk of renal function decline in males, those with renal sufficiency and AKI.	Mentioned care pathway and inclusion criteria but not sample completeness	None	Not mentioned	None	Not mentioned	None	Not mentioned
Jalal K et al [49]	Can billing codes accurately identify rapidly progressing stage 3 and stage 4 chronic kidney disease patients: a diagnostic test study	BMC Nephrology	2019	2007-2017	2010-2019	USA	outpatient	INCLUDE; states EHRs used	large insurer database containing outpatient creatinine measurements [not sure if also inpatient measures included]	CKD	CKD identified by 2x eGFR<60 or ICD coded CKD, using a large insurer database including outpatient serum creatinine measures	not stated; 77% aged over 65		0.39		audit of care provision	evaluation of diagnostic accuracy of ICD-10 codes used to record CKD progression	retrospective cohort study	5	eGFR-CKD: 2xeGFR<60 over 90+ days, no eGFR>60 AND at least 3 years follow up AND at least 5 observations	28762	10927	not mentioned	0.38	not available	28,762 patients with eGFR-CKD (2xeGFR<60, over 90+ days, with no intervening measure >60) [14,657 with ICD-CKD]; 10,927 met criteria for progression analysis	eGFR	CKD-EPI	regression slope of eGFR	linear mixed model	rapid progression	eGFR slope decline > 4 units/year	longitudinal mixed model for patients with eGFR-CKD; fixed and random effects for time of measurement by quarter-year increment	outcome	N/A	primary outcome	mixed modelling methods	linear mixed model	longitudinal mixed model to identify CKD progressors; agreement with ICD-progression compared in ROC analysis	at least 3 years	3	ICD-10 codes display poor capacity to identify rapidly progressing CKD patients when compared to gold standard eGFR measures, demonstrating limitations of coding in CKD diagnosis	Mentioned sample completeness but not implications	None	Not mentioned	None	Not mentioned	mixed modelling	Not mentioned
Kim WJ et al [50]	The role of a treat-to-target approach in the long-term renal outcomes of patients with gout	Journal of clinical medicine	2019	2007-2018	2010-2019	South Korea	not stated	INCLUDE; states EHRs used	electronic medical record databases, no other details of care setting or database details	Gout	Patients with gout newly prescribed urate-lowering therapy (ULT) for at least 12 months	51		0.97		risk factor identification / causal inference	To evaluate impact of treatment to target on changes in renal function	retrospective cohort study	2	baseline eGFR and last on-treatment eGFR at least 12 months after treatment initiation	262	244	not mentioned	0.93	not available	244 analysed; 18 no available data	eGFR	MDRD	absolute change in eGFR from baseline	absolute difference from baseline	none defined	none defined	ANCOVA comparing change in eGFR across 3 treatment groups, adjusted for baseline eGFR groups	outcome	N/A	primary outcome	GLMs	logistic regression	main: logistic regression for improvement in eGFR (last eGFR measure > baseline); other: ANCOVA comparing change in eGFR across 3 treatment groups, adjusted for baseline eGFR groups (stage 1, stage 2, stage 3)	~2 years	2	Improvement in eGFR for those treated-to-target compared to not meeting target, for patients with baseline CKD stage 3	Partially acknowledged implications of sample completeness	None	Not mentioned	None	Not mentioned	None	Mentioned data completeness, but not implications
Lai YJ [51]	Effect of weight loss on the estimated glomerular filtration rates of obese patients at risk of chronic kidney disease: the RIGOR-TMU study	Journal of Cachexia, Sarcopenia and Muscle	2019	2008-2016+	2010-2019	Taiwan	multiple care settings	INCLUDE; states EHRs used	weight reduction intervention on GFR in obese patients with renal impairment TMU study (large long-term propensity matched cohort study for patients who registered at weight reduction centres); includes outpatient, inpatient, lab results, drug prescriptions	Obesity	Obese patients with CKD, registered at weight reduction centres, aged 20-70	37		0.4		risk factor identification / causal inference	To investigate the effects of bariatric surgery on eGFR	retrospective cohort study	3	Excludes patients with misssing "CKD risk" (2 x eGFR (or evidence of proteinuria) over 3+ months); propensity score matched only	4332	1620	not mentioned	not available	not available	Data completeness criteria applied prior to PS matching critiera; Prior to matching, 4059 of 8391 (48.4%) excluded due to missing "CKD risk"	eGFR	Taiwan CKD-EPI	percent change in eGFR from baseline	calculated percent change for each eGFR measure during 1-year follow up period	CKD progression	eGFR decline from baseline >= 25%	CKD progression: eGFR decline >= 25% at any time during a 1-year follow up period	outcome	N/A	primary outcome	Cox PH regression	Cox PH regression	Cox regression for time to eGFR decline >= 25%, comparing bariatric surgery as primary exposure; additional subgroup analyses in proteinuric, diabetic and hypertensive patients.	max 1 year	1	Bariatric surgery was associated with eGFR preservation in all obese patients and particularly those with moderate-to-high CKD risks	Not mentioned	None	Not mentioned	None	Not mentioned	None	Not mentioned
Leither MD et al [52]	The impact of outpatient acute kidney injury on mortality and chronic kidney disease: a retrospective cohort study	NDT	2019	not stated	not stated	USA	multiple care settings	INCLUDE; states EHRs used	Fairview Health Services, large health system in Minnesota; EHRs covering inpatients and outpatients (6 hospitals and medical centers, 40 primary care clinics, 55 specialty clinics), with linkage to death data	general population	all adult patients receiving primary care in the health system, with 2 primary care visits separated by at least 18 months	46		0.43		risk factor identification / causal inference	to investigate whether outpatient AKI is associated with all-cause mortality and renal events	retrospective cohort study	1	no baseline eGFR data was required for analysis; patients were categorised according to AKI status, with one value being no creatinine data. 49% had no baseline creatinine data.	384869	196209	not mentioned	0.51	not available	Patients with no creatinine data could not be analysed for renal outcome but were analysed for mortality outcome; Unclear how many patients LTFU and how this may affect evaluation of renal outcome; Patients were censored at "last data point in HER" (but unclear if requires creatinine data)	eGFR	MDRD	Binary progression (eGFR changes/threshold combination)	50% change from baseline and eGFR <30 (baseline = last value during exposure period; current eGFR based on at least 2 measurements during follow up period)	renal event	at least 50% decline from baseline (last value during 18-month exposure period) to eGFR < 30 (on at least 2 measurements during follow up period)		outcome	N/A	secondary outcome	Cox PH regression	Cox PH regression	Cox PH regression for time to renal event, with adjustment for covariates selected a-priori (comorbidities, vitals, labs, hospitalisation events, previous AKI events); additional adustment for (binary) missingness of each covariate; main exposure was outpatient AKI group (no AKI, AKI with recovery, AKI without recovery, AKI with repeat Cr and no Cr during exposure period)	average 5.3 years	5.3	Outpatient AKI is more prevalent than inpatient AKI and is a risk factor for all-cause mortality and renal events, even amonghtose who recover kidney function	Partially acknowledged implications of sample completeness	None	Not mentioned	None	Not mentioned	None	Tackled methodologically or not an issue
Liu D et al [53]	Serum immunoglobin G provides early risk prediction in immunoglobin A nephropathy	International Immunopharmacology	2019	2009-2014	2010-2019	China	hospital	INCLUDE in sub-analysis; not clear if EHRs used	Second Xiangyu Hospital	IgA nephropathy		32		0.44		risk factor identification / causal inference	investigating the role of serum IgG in progression of IgA	retrospective cohort study	not mentioned	follow up time of at least 2 years, baseline serum IgG data, number of creat measures required unclear	620	455	not mentioned	0.73	not available	620 patients eligible before missing data exclusions; 455 patients with baseline IgG and 2 years follow up; follow up criteria, censoring criteria and how many patients LTFU are unclear	eGFR	MDRD	Binary progression (eGFR changes/threshold combination)	Time to ESRD or an irreversible 50% eGFR reduction; Criteria for ESRD not provided; calculation of reduction of eGFR not provided	not named	ESRD or an irreversible 50% eGFR reduction		outcome	N/A	primary outcome	Cox PH regression	Cox PH regression	multivariate Cox PH regression, primary exposure IgG, different models with adjustments for traditional risk factors and significant risk factors	median 3.7 years	3.7	A decreased serum IgG level is independently associated with a poor renal outcome in IgAN patients	Partially acknowledged implications of sample completeness	None	Not mentioned	None	Not mentioned	None	Not mentioned
Morales-Alvarez MC et al [54]	Renal function decline in latinos with type 2 diabetes	Kidney International Reports	2019	2002-2015	2000-2009	USA	outpatient diabetes	INCLUDE; states EHRs used	Joslin Diabetes Center; outpatient visits data	type 2 diabetes	patients with type 2 diabetes and Hispanic background	57		0.43	Hispanic only	risk factor identification / causal inference	undestanding risk factors of progression	retrospective cohort study	2	decline derived using first and last eGFR; more than one medical visit; more than one creatinine; time interval not specified	916	594	not mentioned	0.65	not available	920 patients "met inclusion cirtieria"; 298 excluded due to missing visits or creatinine; 4 excluded due to ESRD at baseline; 24 patients not accounted for in exclusion reasons	eGFR	not specified	rate of change in eGFR	difference between first and last eGFR, divided by time elapsed (reported in units per year)	rapid progression	loss of >3 units per year in eGFR		outcome	N/A	primary outcome	simple statistical tests	difference in means t-test	descriptive comparison of patient characteristics comparing progressors and non-progressors; t-tests and chi-squared tests for comparisons; (other analysis included Cox PH regression for time to development of CKD, but cohort was not restricted to GFR>60)	not stated	not stated	Renal function decline in Latinos is associated with expected but modifiable variables, such as uncontrolled diabetes, uncontrolled hypertension and being overweight	Mentioned sample completeness but not implications	None	Not mentioned	None	Not mentioned	None	Not mentioned
O’Neill RA et al [55]	Evaluation of long-term intravitreal antivascular endothelial growth factor injections on renal function in patients with and without diabetic kidney disease	BMC Nephrology	2019	2012-2018	2010-2019	UK	multiple care settings	INCLUDE; states EHRs used	electronic healthcare records; Belfast Health and Social Care Trust; EHRs from the Northern Ireland Electronic Care Record (ECR) [contains data from multiple settings: GP, hospital, clinics]	diabetes	treatment for diabetic macular oedema	64		0.59		risk factor identification / causal inference	to study effect of anti-VEGF injections on renal function in patients treated for diabetic macular oedmea (DMO)	retrospective cohort study	not mentioned	renal function measures required prior to first injection and after last injection; exclusions for "insufficient" number of renal function measures, not clarified in detail	not available	85	not mentioned	not available	not available	90 patients met population criteria; 5 excluded due to AKI; analysis requires creatinine after last injection but no mention of any losses to follow up	eGFR	CKD-EPI	regression slope of eGFR	individual linear regression	none defined	none defined	looks like individual linear regression models were used to compute slope of change in eGFR over time	outcome	N/A	primary outcome	multivariate linear regression	linear regression	simple and multivariate regression model for estimating the association between change in eGFR slope and number of injections (assume 2-step process used: (1) estimate change in eGFR; (2) estimate association), adjustments for diabetes, CVD, hypertension and PPIs but not demographics	2.6 years	2.6	No association between increasing number of injections and rate of eGFR decline; long-term treatment does not significantly impact change in eGFR and/or ACE	Not mentioned	None	Not mentioned	None	Not mentioned	None	Not mentioned
Posch F et al [57]	Longitudinal kidney function trajectories predict major bleeding, hospitalisation and death in patients with atrial fibrillation and chronic kidney disease	International Journal of Cardiology	2019	2009-2015	2010-2019	UK	primary care	INCLUDE; states EHRs used	primary care electronic database, IMS-THIN; 616 GP practices	atrial fibrillation	newly diagnosed concurrent atrial fibrillation and CKD stage 3/4	80		0.45	elderly cohort	risk factor identification / causal inference	to idnetify the role of kidney function decline to predict individual patient adverse outcomes (some discussion around potential for individual risk prediction but not achieved in this specific research; instead causal inference statements made about effects of eGFR changes on outcomes)	retrospective cohort study	1	exclusions for "missing eGFR values" and "follow-up <6 months"; details of criteria not clarified; min number of measures identified from statistics on range of number of eGFR measures per patient	20780	18240	not mentioned	0.88	not available	20780 patients met morbidity criteria; 2540 patients excluded due to missing data; death was only reason provided for LTFU, no other losses to follow up (or poor/reduced follow up) discussed; rates of LTFU prior to end of study date not provided with data capture simply capped at last entry in database	eGFR	not specified	rate of change in eGFR	annualised absolute change in eGFR after baseline	none defined	none defined		exposure	(time to) stroke, major bleeding, hospitalisation, all-cause death	primary exposure	joint modelling	joint longitudinal survival model	Joint model specified as follows: (1) linear mixed model for eGFR with random intercept and slope, (2) Weibull proprtional hazards model for time to 4 clinical outcomes, (3) "1st derivative" specification of association parameter alpha; (4) un-structured variance-covariance matrix; (other simpler models included Cox regression, Fine & Gray competing risk regression, Semi-Markov Multistate Models)…	median 1.9 years (between first and last GFR); longer for outcomes follow up	1.9	Declining kidney function is a critical determinant of unfavourable outcomes in patients with AF and CKD. Longitudinal kidney function trajectories may enable a much more individualised prediction of adverse outcomes.	Fully acknowledged implications of sample completeness	Detailed/ comprehensive database of EHRs used	Tackled methodologically	Joint modelling of longitudinal changes and time to drop out	Tackled methodologically	mixed modelling	Not relevant (no covariate analysis)
Posch F et al [58]	Exposure to vitamin k antagonists and kidney function decline in patients with atrial fibrillation and chronic kidney disease	Research and practice in thrombosis and haemostasis	2019	2009-2015	2010-2019	Germany	primary care	INCLUDE; states EHRs used	primary care electronic database; IMS Disease Analyzer Germany (IMS-DA); data routinely collected from ~1300 primary care physicians in Germany	atrial fibrillation	newly diagnosed concomitant atrial fibrillation and CKD stage 3/4	78	1	0.52		risk factor identification / causal inference	to evaluate the impact of vitamin k exposure on kidney function	retrospective cohort study	1	Require an eGFR measure at or after baseline; require baseline CHA2DS2VASc score	37476	14432	not mentioned	0.39	not available	37,476 met AF/CKD criteria, of which 14,432 met inclusion criteria (mostly based on data completeness)	eGFR	not specified	regression slope of eGFR (absolute scale and percent scale)	linear mixed model (eGFR scale and log-eGFR)	not named	30% decline in eGFR during follow up at least once		outcome	N/A	primary outcome	mixed modelling methods	linear mixed model	linear mixed model with random intercept and slope and linear, quadratic and cubic terms for time, unadjusted and adjusted for age, CHA2DS2VASc score, and baseline eGFR; interaction terms to allow different exposure effects on slope; both absolute eGFR scale and log-eGFR scale used providing linear and percent interpretations of regression slopes; sensitivity analysis with propensity score adjust…	median 1.4 years	1.4	VKA use is associated with accelarated eGFR decline, independent of age, CHA-score and baseline eGFR	Fully acknowledged implications of sample completeness	None	Fully acknowledged implications of losses to follow up	None	Tackled methodologically	mixed modelling	Fully acknowledged implications of data completeness
Spanopoulos D et al [59]	Temporal variation of renal function in people with type 2 diabetes mellitus: a retrospective UK clinical practice research datalink cohort study	Diabetes, Obesity and Metabolism	2019	2009-2016	2010-2019	UK	primary care	INCLUDE; states EHRs used	CPRD including primary care data for 10 million people covering 10% of UK practices and population representation (age, sex, eth, BMI) with linkage to HES to improve ethnicity coding	type 2 diabetes	type 2 diabetes diagnosis between 2009-2011	62		0.56		descriptive characterisation of changes in renal function	to characterise longitudinal variability of eGFR (to support appropriate dosing of glucose-lowering medications that depends on renal function)	retrospective cohort study	6	require 1 measure of creatinine after T2DM diagnosis and at least one measure in 5 yearly intervals post first creatinine; at least 12 months registered at practice	46813	7766	not mentioned	0.17	not available	46813 had newly diagnosed T2DM; 7766 met inclusion criteria (based on creatinine data); drop out not possible since sampling based on 5 years FU (survival bias)	eGFR	CKD-EPI	transition to CKD stages	raw change between eGFR measures	none defined	none defined		outcome	N/A	primary outcome	descriptive results only	descriptive result only; no statistical analysis	Descriptive analysis of number of times a patients changes CKD category, compared each year over a 5 year period, with comparison by basleine CKD stage; additional analysis comparing baseline and year 5 transition probabilities	5 years	5	There was considerable variation between GFR categories and individuals, highlighting issues for prescribing glucose-lowering therapies requiring dose adjsutment based on GFR. Regular monitoring is important.	Partially acknowledged implications of sample completeness	None	Fully acknowledged implications of losses to follow up	None	Partially acknowledged implications of data completeness	None	Partially acknowledged implications of data completeness
Wang Y et al [60]	Implications of a family history of diabetes and rapid eGFR decline in patients with type 2 diabetes and biopsy-proven diabetic kidney disease	frontiers in Endocrinology	2019	2007-2017	2010-2019	China	hospital	INCLUDE; states EHRs used	EHRs for West China Hospital	diabetic kidney disease	type 2 diabetes and biopsy-proven diabetic kidney disease (DKD)	52		0.76		risk factor identification / causal inference	to identify risk factors for rapid decline in eGFR	retrospective cohort study	3	at least 3 creatinine measures post-biopsy; all creat performed in same hospital; follow-up min 1 year	not mentioned	128	not mentioned	not available	not available	no info on patients excluded from analysis and why; min 1 year follow up required but no data or reasons on LTFU	eGFR	CKD-EPI	regression slope of eGFR	individual linear regression	relatively rapid eGFR decline	eGFR slope worse than median slope (-8.1 units per year)		outcome	N/A	primary outcome	GLMs	logistic regression	Multivariate logistic regression to identify risk factors for a rapid decline in eGFR; not explicitly stated but looks like only variables with statistically significan univariate association were included in multivariate model	2 years	2	A family history of diabetes is an independent risk factor for rapid decline in eGFR, suggesting that early diagnosis and treatment is important for these patients	Partially acknowledged implications of sample completeness	None	Not mentioned	None	Mentioned data completeness, but not implications	None	Not mentioned
Yoo H et al [61]	Effects of sarpogrelate on microvascular complications with type 2 diabetes	International Journal of Clinical Pharmacy	2019	2010-2015	2010-2019	South Korea	tertiary hospital	INCLUDE; states EHRs used	a 1108-bed tertiary university hospital; electronic medical records; clinical data warehouse	type 2 diabetes	type 2 diabetes treated with antidiabetics	55		0.59		risk factor identification / causal inference	to investigate the effects of sarpogrelate with metformin-based antidiabetic therapy on microvascular complications including nephropathy, neuropathy and retinopathy	retrospective cohort study	not mentioned	patients excluded "without lab values for serum creatinine" (no further details); propensity score matched only	5334	478	not mentioned	not available	not available	6643 patients with DM treated with antidiabetics; 2952 excluded due to no creatinine labs; 1309 exclude due to co-morbidity exclusions; only 478 included after propensity score matching. Could not compute percent analysed, as data compelteness and population critiera mixed up.	eGFR	MDRD	percent change in eGFR from baseline	percent change between baseline and follow up measures	CKD progression	30% reduction from baseline, 30-50% and 50%		outcome	N/A	secondary outcome	KM / life-table	kaplan meier estimation + log-rank test	Propensity score matched cohort comparing sarpogrelate vs no sarpogrelate; kaplan meier and log-rank test for 30% reduction in eGFR outcome	5.7 years	5.7	No significant difference in time to 30% reduction in eGFR by treat groups	Fully acknowledged implications of sample completeness	None	Not mentioned	None	Mentioned data completeness, but not implications	None	Fully acknowledged implications of data completeness
Zhao J et al [62]	Predicting outcomes of chronic kidney disease from EMR data based on random forest regression	Mathematical Biosciences	2019	2009-2017	2010-2019	USA	primary care	INCLUDE; states EHRs used	dataset of EHRs for 120,495 patients aged 20-80; region receiving primary care from Sanford Health; Sanford EMR database	general population	all patients in primary care database with 3+ eGFR measures over 7 years	57		0.44	99.9% white	risk prediction	to develop and validate a prediction model of eGFR to be used in clinical practice	cross-sectional study	3	at least 3 eGFR values between 2011 to 2017; to predict an individual's eGFR in 2015, a value in 2015 is required plus two further values from 2011-2014; similar criteria apply to 2016 and 2017	120495	61740	not mentioned	0.51	not available	120495 patients aged 20-80 receiving primary care from Sanford Health (unclear if requires at least 1 eGFR over 10 years); 61740 patients with at least 3 eGFR measures over 7 years	eGFR	CKD-EPI	eGFR prediction at multiple time points	eGFR value in years 2015, 2016, 2017	none defined	none defined		outcome	N/A	primary outcome	machine learning methods	random forest regression	Random forest regression to predict 1-year, 2-year and 3-year eGFRs from historical eGFR records between 2011-2014, with adjustment for covariates (baseline eGFR, age, sex, ethnicity, BMI, hypertension, diabetes, obesity); sci-kit learn package used for all models; estimated eGFR values classified in CKD stages;	not stated	not stated	A model using real-world electronic medical records data can accurately predict future kidney functions and provide clinical decision support; R-squared goodness-of-fit was high (~0.95), but decreased over the 3 years; Previous eGFR was most important predictor/feature, followed by BMI, then age. Other features were much less impactful (race, eth, hyp, diabetes, obesity)	Fully acknowledged implications of sample completeness	None	Not mentioned	None	Partially acknowledged implications of data completeness	Imputation with median	Not mentioned
Cabrera CS et al [67]	Impact of CKD Progression on Cardiovascular Disease Risk in a Contemporary UK Cohort of Individuals With Diabetes	KI reports	2020	2005-2015	2010-2019	UK	primary care	INCLUDE; states EHRs used	CPRD GOLD	CKD	Incident CKD patients in population of type 2 diabetes	71		0.46		risk factor identification / causal inference	to evaluate the association between CKD progression and risk of CVD	retrospective cohort study	3	Min 2 x eGFR required for baseline eGFR assessment; Min 1 x eGFR post-baseline; Exclude if >2 year gap to next eGFR at any time	53174	30222	not available	0.57	not available	From flow chart, 56,504 CKD patients with prior diabetes diagnosis meeting population critieria, but 3,330 met CVD exclusion criteria -> approx 53,174 target pop but could be a bit less; Note: patients excluded if no eGFR post-baseline or >2 year gap between follow-up measures; Patients with CVD events in 2-year baseline period post-index date were excluded (survival bias?); No data on drop-outs …	eGFR	CKD-EPI	regression slope of eGFR	individual linear regression (time-updated)	"Updated eGFr slope <-3"?	time-updated indiviudal linear regressions over overlapping 2-year periods		exposure	CV outcomes: HF, MI, stroke + composite (MACE plus)	primary exposure	Cox PH regression	Cox PH regression	Cox PH regression with time-updated mean eGFR and time-updated eGFR slope, adjusted for confounders; time-updated eGFR slopes were calculateed throughout follow-up in overlapping 2-year periods	4.3 years	4.3	Faster eGFR decline was asscoiated with increased CV risk	Mentioned sample completeness but not implications	None	Not mentioned	None	Mentioned data completeness but not implications	None	Partially acknowledged implications of data completeness
Cleary F et al [68]	Feasibility of evaluation of the natural history of kidney disease in the general population using electronic healthcare records	Clincal Kidney Journal	2020	2008-2016	2010-2019	UK	primary care	INCLUDE; states EHRs used	primary care EHRs; NCKDA database	general population	Patients with eGFR tests in primary care	not stated		0.48	adults with at least 3 eGFR test results in primary care data	descriptive characterisation of changes in renal function	to estimate slope of decline in population subgroups and evaluate sensitivity of estimation to measurement methods	retrospective cohort study	3	At least 3 valid eGFR results required for analysis; Sensitivity analysis based on data availability restrictions	6513000	1597629	39091	0.25	0.024	Drop-out assessed as no eGFR test in last 3 years despite 3x prior eGFR	eGFR	MDRD	regression slope of eGFR	individual linear regression	none defined	none defined		outcome	N/A	primary outcome	linear regression	linear regression	individual linear regression of eGFR, aggregated in all adults and separately in subgroups	5.7 years	5.7	Evaluation of long-term changes in renal function will be possible in high risk patients if creatinine calibration problems are overcome	Fully acknowledged implications of sample completeness	None	Fully acknowledged implications of losses to follow up	None	Fully acknowledged implications of data completeness	None	Not relevant
Faraj KS et al [69]	The effect of urinary diversion on long-term kidney function after cystectomy	Urologic oncology	2020	2007-2018+	2010-2019	USA	outpatient	INCLUDE; states EHRs used	EHR of Mayo Clinic	urinary system disorders	patients underoing cystectomy with urinary diversion (surgery) with any indication	72		0.79		risk factor identification / causal inference	to compare long-term kidney function after cystectomy by type of urinary diversion	retrospective cohort study	not stated	at least 1 x follow up creatinine; but unclear if require pre-op creatinines	573	563	not available	0.98	not available	573 patients identified for EHR search; 5 excluded for dialysis and 5 excluded due to no follow up creatinine; 563 patients in analysis; no data on dropouts	eGFR	CKD-EPI	regression slope of eGFR	linear mixed model	none defined	none defined		outcome	N/A	primary outcome	mixed modelling methods	linear mixed model	linear mixed model with inverse probability of treatment weighting (IPTW), adjusted for covariates; sensitivity analyses in CKD-EPI vs MRDR and eGFR>/<40 and in benign indications	median 3.9 years	3.9	Kidney deterioration may be lower over time for neobladder (NB) than ideal-conduit (IC) urinary diversion.	Tackled methodologically	Detailed/ comprehensive database of EHRs used	Mentioned losses to follow up but not implications	None	Tackled methodologically	Mixed modelling	Not mentioned
Inaguma D et al [70]	Increasing tendency of urine protein is a risk factor for rapid eGFR decline in patients with CKD: A machine learning-based prediction model by using a big database	PLOS ONE	2020	2004-2019	2010-2019	Japan	outpatient	INCLUDE; states EHRs used	big hospital database; electronic medical records system; healthcare setting unclear; "outpatients suffering from various diseases involving CKD"	CKD	CKD = eGFR < 60 and/or urine protein >1+ (dipstick method) over 90+ days	69		0.58		risk prediction	to predict rapid decline in kindney function	case control study	not stated	unclear; patients exhibiting (and instances of) eGFR decline were identified first, and then non-declining patients/instances were matched to declines using some unclear matching criteria	19894 (pre-PS matching)	9911	not relevant (complete case analysis)	not available	not relevant (complete case analysis)	19,894 in database met CKD criteria; 9,911 met analysis criteria based on having rapid decline or being matched to a patient with rapid decline; Unclear what data availability was required to identify patients with decline / no decline	eGFR	not specified	Rate of percentage change in eGFR, not clearly defined	decline of 30% or more in eGFR within a period of 2 years, unclear how derived	rapid eGFR decline	decline of 30% or more in eGFR within a period of 2 years, unclear how derived	"to avoid temporal spikes", averaged eGFR measures over a period of 90 days (not clear how incoporated in derivation)	outcome	N/A	primary outcome	machine learning algorithms	Logistic regression; Random forest regression	2 machine learning algorithms: logistic regression and random forest regression. Case control design where decliners and non-decliners identified first and look back at prior characteristics over various time-periods	not stated	not stated	Model AUCs of 0.71 and 0.73; Urine protein is a prominent risk factor for decline	Mentioned sample completeness but not implications	None	Not mentioned	None	Not mentioned	None	Tackled methodologically
Lee JS et al [63]	Recovery of renal function in patients with lupus nephritis and reduced renal function: the beneficial effect of hydroxychloroquine	Lupus	2020	1995-2018	2000-2009	South Korea	tertiary hospital	INCLUDE; states EHRs used	electronic medical records; tertiary referral hospital	lupus nephritis	lupus nephritis and eGFR<60	38		0.28		risk factor identification / causal inference	to investigate renal function recovery and associated factors	retrospective cohort study	2	one baseline eGFR and one eGFR at 6 months	90	90	0	1	not relevant (complete case analysis)	90 patients with diagnosed LN and eGFR<60; percentages provided for outcomes suggest all analysed at 6 months; further data that 87 patients had data for one year strengthens this assumption	eGFR	MDRD	binary progression to threshold eGFR	threshold eGFR value at 6 months; eGFR >60 at 6 months post-baseline, where baseline eGFR<60	Renal function recovery	eGFR > 60 six months post-baseline		outcome	N/A	primary outcome	GLMs	logistic regression	logistic regression analysis with stepwise elimination to identify factors associated with renal function (variables included if p<0.15 on univariate analysis but require p<0.05 to remain in multivariate analysis); both univariate and multivariate analysis results provided	6 months	0.5	Renal function recovery occurred in 51% of patients, and factors associated with renal function recovery were use of hydroxychloroquine, shorter duration of LN and higher grade tubular atrophy	Fully acknowledged implications of sample completeness	Detailed/ comprehensive database of EHRs used	Tackled methodologically	Complete follow up	Not mentioned	None	Fully acknowledged implications of data completeness
Nakamura A et al [64]	Impact of sodium-glucose cotransporter 2 inhibitors on renal function in participants with type 2 diabetes and chronic kidney disease with normoalbuminuria	Diabetology & Metabolic Syndrome	2020	not stated	not stated	Japan	outpatient diabetes	INCLUDE in sub-analysis; not clear if EHRs used	outpatient center at Kurihara clinic	type 2 diabetes	type 2 diabetes and CKD	66		0.54		risk factor identification / causal inference	effects of SGLT2 inhibitors on renal funciton in type 2 diabetes and CKD, compared by albuminuria status	retrospective cohort study	2	eGFR at baseline and 2 years	not available	87	not mentioned	not available	not relevant (complete case analysis)	553 patients treated for 2 years; 87 analysed; reasons for exclusion include eGFR>60 and incomplete data but no breakdown of percent excluded for lack of data rather than failing to meet population criteria	eGFR	not specified	percent change in eGFR from baseline	percent change in eGFR between 2 measures (baseline and at 2 years post-treatment)	none defined	none defined		outcome	N/A	primary outcome	ANOVA	ANOVA	One-way ANOVA for comaprison of change in eGFR over 2 years, comparing albuminuria at baseline groups	2 years	2	More favourable treatment effects were observed in the normoalbuminuria group, suggesting reno-protective effects depend on degree of albuminuria	Not mentioned	None	Not mentioned	None	Not mentioned	None	Not relevant (no covariate analysis)
Nichols GA et al [71]	Kidney disease progression and all-cause mortality across estimated glomerular filtration rate and albuminuria categories among patients with vs. Without type 2 diabetes	BMC Nephrology	2020	2006-2016	2010-2019	USA	multiple care settings	INCLUDE; states EHRs used	EHR of Kaiser Permanente Northwest (KPNW); integrated delivery system serving approx 550,000 patients, covers insured patients; representative of service area	Diabetes		61		0.52		risk factor identification / causal inference	to compare CKD progression in diabetes vs no diabetes	retrospective cohort study	2	Required 1x baseline eGFR duing 2006-2012 (and urine ACR or dipstick proteinuria within 6 months of baseline eGFR), plus >=1 x eGFR during follow up [Note: initial eGFR decline analyses did not require ACR/proteinuria data]	78590	approx 36727	not available	0.47	not available	39,295 patients met type 2 diabetes definition prior to 2013 and were 1:1 matched to non-diabetics = 78,590; 9613 excluded with no eGFR in 2006-2012; 3854 excluded due to no follow up creatinine; initial analysis cohort = 65132; Number of losses to follow up not mentioned; approx 28405 patients had no ACR/proteinuria data (calculated from Table 1, not explicitly stated) -> 36,727 in main analysis…	eGFR	CKD-EPI	Transition between CKD stages	2 x eGFR in KDIGO-defined CKD stages over 90-365 days	progression of kidney dysfunction to next CKD stage	2 x eGFR in KDIGO-defined CKD stages over 90-365 days	Progression to next CKD stage summarised separately by initial CKD stage (G1/G2->G3a/3b, G3a/3b->G4,G4->ESKD); Those without 2xeGFR in next CKD stage deemed to have remained at baseline stage	outcome	N/A	primary outcome	KM / lifetable	life-table analysis	Various analyses of CKD progression in 1:1 matched cohort (age, sex, year of baseline creatinine) of diabetics and non-diabetics: (1) Comparison of annual rate of eGFR decline, adjusted for age, sex, number of eGFR measures in diabetes vs non-diabetes; (2) life table analysis for probability of tranistion between CKD stages at 1,3 and 5 years; (3) Progression to ESKD (but not eligible outcome due…	5 years	5	Presence of albuminuria was associated with accelerated eGFR decline independent of diabetes status	Fully acknowledged implications of sample completeness	None	Partially acknowledged implications of losses to follow up	None	Partially acknowledged implications of data completeness	None	Not relevant (no covariate analysis)
Peng YL et al [72]	Comparison of uric acid reduction and renal outcomes of febuxostat vs allopurinol in patients with chronic kidney disease	Scientific reports	2020	2010-2015	2010-2019	Taiwan	multiple care settings	INCLUDE; states EHRs used	electronic healthcare records from a large healthcare delivery system in Taiwan; Chang Gung Research Database (CGRD) from a group of hospitals in Taiwan; detailed diagnositic, prescription and lab test results from emergency department, inpatient and outpatient settings	CKD	Adult CKD patients newly treated with urate-lowering therapy (ULT)	67		0.76		risk factor identification / causal inference	to investigate the effect of ULT on renal function	retrospective cohort study	not stated	Excluding: lack of any medical records 365 days before and after index date, lack of SUA and creatinine lab results, and no CKD diagnosis during study period; Require CKD ICD-9 code within 1-year prior to index date; at least 2 serum creatinine at baseline but unclear if follow-up restrictions	5977 (pre-PS matching)	1050	not available	not available	not available	From flow chart, 5977 new drug users with CKD; 5,628 new drug users fulfilled study inclusion criteria; 1,050 in 1:1 propensity-score matched cohort. Number "LTFU" (and therefore censored) not mentioned; avg follow up years was 1.4 years, despite intended 2.5 years follow up period. Since PS matching applied after exclusions due to eGFR data completeness, cannot compute percent of target populati…	eGFR	MDRD	regression slope of eGFR	linear mixed model	eGFR decline	Raw percent change from baseline (where baseline is avg of at least 2 measures) >= 30%	2 x eligible renal outcomes: (1) change in eGFR from baseline, (2) incident eGFR decline >= 30% from baseline; adjusted analysis in binary outcome	outcome	N/A	secondary outcome	Cox PH regression	linear mixed model	Main analysis: Linear mixed model with adjustment; Other analyses: Adjusted Cox regression; t-tests for change from baseline.	1.5 years	1.5	There were no significant differences in mean eGFR change over time or risk of eGFR decline >= 30% from baseline between treatment groups	Partially acknowledged implications of sample completeness	None	Partially acknowledged implications of losses to follow up	None	Partially acknowledged implications of data completeness	Mixed modelling	Not mentioned
Rej S et al [73]	Association of Lithium Use and a Higher Serum Concentration of Lithium With the Risk of Declining Renal Function in Older Adults: A Population-Based Cohort Study	Early Career Psychiatrists	2020	2007-2015	2010-2019	Canada	multiple care settings	INCLUDE; states EHRs used	linked healthcare databases in Ontario, Canada; residents of Ontario, Canada; inpatient and outpatient data; outpatient serum creatinine data	general population	general population cohort; older adults	71		0.41	residents of Ontario province aged >= 66 with 2 prescriptions of either lithium or valporate	risk factor identification / causal inference	to compare risk of renal function decline in lithium users vs valporate, and to investigate any interaction with baseline lithium levels	retrospective cohort study	1	at least 1 x creatinine in year prior to index date (when prescription filled); AND at least 1 lithium value in year prior to index date (lithium users only)	12544 (pre-PS)	6226	not available	not available	not available	12,544 drug-users prior to creaitnine/lithium data exclusions; 10,114 post data exclusions; 3113 lithium users matched 1:1 to 3113 valporate users resulting in 6226 patients for analysis; no data on LTFU; Data completeness not available post-PS matching; 2430 of 28778 excluded due to data completeness pre-PS matching (92% met critieria prior to PS matching)	eGFR	CKD-EPI	percent change in eGFR from baseline	raw percent change in eGFR from baseline, for any measure during follow up	"clinically important decline"	>= 30% loss in eGFR from baseline, at any time during follow up		outcome	N/A	primary outcome	Cox PH regression; Propensity score matching	Cox PH regression	1:1 propensity score matched analysis cohort; Cox PH regression for time to >= 30% loss in eGFR comparing lithium and valporate users; censoring for end of data availability (Sep 30 2015)) or death; subgroup analyses by baseline lithium levels and by CKD status; interaction explored by lithium levels also	median 3.1 years	3.1	Lithium was associated with a 14% increased risk of clinically important renal function decline compared to valporate users	Partially acknowledged implications of sample completeness	None	Not mentioned	None	Not mentioned	None	Not mentioned
Sise ME et al [65]	Direct-acting antiviral therapy slows kidney function decline in patients with Hepatitis C virus infection and chronic kidney disease	Kidney International	2020	2013-2017	2010-2019	USA	hospital	INCLUDE; states EHRs used	Patients seen in the Partners Healthcare system, Research Patient Data Repository (registry of EHRs);	hepatitis C virus (HCV) infection	HCV infected patients receiveing direct-acting antiviral (DAA) therapies from 2013-2017	56		0.64		risk factor identification / causal inference	to determine the effect of DAA therapy on rate of decline of eGFR	retrospective cohort study	4	at least 2 creatinine measures in the 3 years before therapy start and at least 2 creatinine measures in up to 3 years after	1953	1178	not mentioned	0.6	not available	2319 patients prescribed DAAs; 1953 after exclusions for not meeting population criteria (no treatment, organ transplant, RRT); 1590 with baseline creatinine; 1178 included in primary analysis of slopes requiring 4 creatinine measures	eGFR	CKD-EPI	regression slope of eGFR	GEEs	none defined	none defined		outcome	N/A	primary outcome	generalised estimating equations	generalised estimating equations	Generalised estimating equations (GEEs) estimating pre-therapy and post-therapy slope with a sandwhich estimator of variance to account for correlations within subjects, includes interaction between therapy and slope to estimate difference in slopes pre- and post- therapy, adjusted for age, diabetes and baseline eGFR; gender/race removed from model since "not significant confounders"; analysis st…	1.6 years (post-therapy)	1.6	DAA therapy for HCV infection may slow CKD progression	Partially acknowledged implications of sample completeness	None	Not mentioned	None	Partially acknowledged implications of data completeness	GEEs	Not mentioned
Weldegiorgis M et al [66]	Socioeconomic disadvantage and the risk of advanced chronic kidney disease: results from a cohort study with 1.4 million participants	Nephrol Dialysis Transplant	2020	2000-2014+	2000-2009	UK	primary care	INCLUDE; states EHRs used	English CPRD (2000-2014) linked to HES and mortality data;	general population	Valid BMI 2000-2014, age 20-87, BMI 15-60; excluding CKD stage 4+ (coded or eGFR<30)	48.6		0.418	Required BMI data for inclusion (not relevant for analysis; selection bias)	risk factor identification / causal inference	to investigate effect of socioeconomic deprivation on CKD progression/outcomes	retrospective cohort study	0	Main analysis did not require eGFR data at baseline and outcome could potentially be obtained by CKD codes without requiring eGFR data; at least 2 years of "data" before baseline date and at least 3 years of follow up thereafter (FU end at death / leaving practice / 30-3-2014 [ref 14])	not available	1397573	not available	not available	not available	4.4 million patients in UK CPRD database before excluding 25% ineligible practices not in England; 1,405,016 = Valid BMI record between Jan 2000 - March 2014 (based on cohort from a previous study looking at BMI associations) = main study population; 1,397,573 = MAIN analysis, excluding those with CKD stage 4+ at baseline or in first 3 years follow up; Secondary analysis adjusted for eGFR requiri…	eGFR	CKD-EPI	(time to) progression to stage 4 CKD	Algorithm of CKD codes + labs (eGFR<30 over 90+ days, no intermmediate eGFR >30)	incident CKD stages 4-5	binary progression to stage 4-5 CKD (codes+labs)		outcome	N/A	primary outcome	Cox PH regression	Cox PH regression	Cox PH regression; 4 models: (1) unadjusted; (2=MAIN MODEL) adj age+sex; (3) adj age, sex, smoking, BMI, diabetes, BP, CVD; (4) mod-3 + baseline eGFR; Subgroup analyses also performed	7.5 years	7.5	Socioeconomic deprivation is independently associated with an increased hazard of CKD stages 4-5 and ESRD.	Not mentioned	None	Not mentioned	None	Not mentioned	None	Not mentioned
Jackevicius CA et al [74]	Bleeding Risk of Direct Oral Anticoagulants in Patients With Heart Failure And Atrial Fibrillation	Circulation: Cardiovascular Quality and Outcomes	2021	2010-2018	2010-2019	USA	multiple care settings	INCLUDE; states EHRs used	linked veterans administration databases; inpatient and outpatient data	heart failure / atrial fibrillation	patients with heart failure newly prescribed warfarin or DOACS for atrial fibrillation	72		0.99		risk factor identification / causal inference	to compare bleeding outcomes in use of DOACs and warfarin, investigating any interaction with renal function changes	retrospective cohort study	not stated	Analysis crtieria for eGFR unclear; 4,338 patients excluded in flow chart for "no follow up" but not defined.	53796	49458	not available	0.92	not available	53,796 met inclusion criteria before follow up criteria applied; 49458 included after follow up criteria applied; missing data at baseline was imputed so no patients excluded on that basis	eGFR	MDRD	Rate of percentage change in eGFR, not clearly defined	percent change in eGFR at any time during follow up (not clear if from baseline or between adjacent measures)	transient or persistent renal function decline	20% reduction in eGFR at any time during follow up	full derivation not described	exposure	bleeding events	secondary exposure	Cox PH regression	Cox PH regression	Secondary analysis of changes in renal function: IPTW-weighted Cox PH regression for bleeding events, compared by whether renal function decline occurred, separately by treatment group; (other analyses included comparison of change in eGFR from baseline by treatment group)	approx 1.4 years	1.4	DOACs were associated with lower risk of bleeding; a 20% decline in renal function was independently associated with increased bleeding in DOAC-treated patients and increased monitoring for dose-adjustments are required	Tackled methodologically	Other imputation methods to avoid exclusions	Partially acknowledged implications of losses to follow up	Sensitivity analysis adjusting for competing risk of death	Not mentioned	None	Tackled methodologically
Neuen BL et al [75]	Changes in GFR and Albuminuria in Routine Clinical Practice and the Risk of Kidney Disease Progression	American Journal of Kidney Disease	2021	2000-2015	2000-2009	UK	primary care	INCLUDE; states EHRs used	CPRD, 700 primary care practices in UK, representing 8% of entire UK population; inpatient eGFR/UACR were not included	general population	indiviudals with spot UACR and eGFR assessments approx 3 years apart between 2000-2015, aged 20-79	65		0.57		risk factor identification / causal inference	to investigate whether combined eGFR/ACR predict advanced kidney disease better than either measure alone	retrospective cohort study	2	Require UACR and eGFR assessments approx 3 years apart between 2000-2015	8157969	91319	not available	0.01	not available	This was a general population cohort with analysis based purely on repeat eGFR/UACR availability; From flow chart, 8,157,969 patients were identified in linked database; 91,319 had paired UACR and eGFR tests over approx three-year exposure window	eGFR	CKD-EPI	percent change in eGFR between measures	Change in eGFR was calculated over an approximate 3-year exposure window using the eGFR value closest to the paired UACR value	advanced CKD	2 x eGFR<30 over 90+ days with no intermediate eGFR>30	Here, changes in renal function were exposures and outcomes. Since the study looked at progression to CKD stage 4 as the outcome for long-term renal function changes, this was used as the main measure summarised here	exposure (and outcome)	advanced CKD	primary exposure	Cox PH regression	Cox PH regression	Multivariate Cox PH regression, using 3 models; Model 1 = basic adjustment, Model 2 = full adjustment, Model 3 = Model 2 variables with multiple imputation, using predictive mean matching for continuous variables and multinomial logistic regression for categorical variables; Model 3 multiple imputation was "sensitivity analysis... to assess bias due to missing data"; assessment of effects of chan…	median 2.9 years	2.9	The combination of changes in UACR and eGFR predicted kidney outcomes better than either alone; changes in eGFR were more important than changes in UACR in prediction of progression	Partially acknowledged implications of sample completeness	Multiple imputation to avoid exclusions	Not mentioned	None	Not mentioned	None	Tackled methodologically
Niu SF et al [76]	Early Chronic Kidney Disease Care Programme delays kidney function deterioration in patients with stage I-IIIa chronic kidney disease: an observational cohort study in Taiwan	BMJ Open	2021	2012-2017+	2010-2019	Taiwan	hospital	INCLUDE; states EHRs used	Taipei Medical University Research Database; 3 hospitals; CKD patients identified from hospital database; hospital data used, unclear if just outpatient data or also any inpatient data collected	CKD	CKD stages 1-3a	67		0.66		risk factor identification / causal inference	to investigate the impact of enrollment in a CKD Care Programme on CKD progression	retrospective cohort study	1	at least 2 medical visits between 2012-2017; looks like at least 1 x eGFR	not available	3114	not available	not available	not available	307,762 patients had 2 x medical visits, of which 159,774 adults had CKD stages <= 3a; 3114 patients included after propensity score matching; No mention of number of patients dropping out over course of follow up. Cannot compute percent analysed as only patients with at least 2 medical visits shown in flow chart	eGFR	MDRD	(time to) progression to stage 3b CKD	single eGFR < 45	Progression to CKD stage 3b	single eGFR < 45		outcome	N/A	primary outcome	Cox PH regression	Cox PH regression	1:2 propensity score matched cohort using age, sex, eGFR and CKD stage (intervention: control); multivariate Cox PH regression for progresson to CKD stage 3b. Also subgroup analysis by CKD stage (3a, <3a)	median 3.0 years	3	The Early CKD Programme was an independent protective factor against progression of early CKD	Partially acknowledged implications of sample completeness	None	Partially acknowledged implications of losses to follow up	None	Mentioned care pathway follow up but not data completeness	None	Not mentioned
Robinson DE et al [77]	Safety of Oral Bisphosphonates in Moderate-to-Severe Chronic Kidney Disease: A Binational Cohort Analysis	Journal of Bone and Mineral Research	2021	1997-2016	2000-2009	multiple European countries	multiple care settings	INCLUDE; states EHRs used	primary care EHRs from 2 cohorts: CPRD GOLD (1997-2016, UK) and SIDIAP (2007-2015, Catalonia); linked to hospital records; SIDIAP also linked to ESRD registry data; eGFR from primary care data but transplant/dialysis from linked data	CKD	CKD stages 3b-5 (2xeGFR<45), age 40+	80		0.27	Mean age, percent male shown in PS matched cohort	risk factor identification / causal inference	to investigate the safety of oral biophsophonates (primary outcome CKD stage worsening) in moderate to severe CKD	retrospective cohort study	3	2 x eGFR<45 + follow-up eGFR	not available	19324	not available	not available	not available	Patients excluded if missing IMD or no follow-up eGFR. Flow chart provided. Data on specific exclusions in CPRD but not Spain data so cannot compute percent analysed overall. Some analyses in full cohort and some in PS matched reduced cohort. No data on losses to follow up over time. Matched analysis considered primary and sample size shown.	eGFR	CKD-EPI	(time to) transition between CKD stages	Increase in CKD stage from 3b to 4/5 or 4 to 5, based on eGFR CKD stages and coded dialysis/transplant	CKD stage worsening	Increase in CKD stage from 3b to 4/5 or 4 to 5, based on eGFR CKD stages and coded dialysis/transplant		outcome	N/A	primary outcome	competing risks survival models	competing risks survival models	Adjusted Cox PH regression in unmatched cohort; Fine and Gray models in matched cohort to account for any difference in death rate due to PS matching (primary analysis); outcome increase in CKD stage; propensity score matched cohort using logistic regression based on 45 covariates; missing covariate data imputed using MI (assuming MAR). Results combined from both cohorts using meta-analysis. Inte…	approx 3.7 years	3.7	Biophosphonate use was associated with a modest increased risk of CKD progression in both cohorts	Partially acknowledged implications of sample completeness	Multiple imputation to avoid exclusions	Partially acknowledged implications of losses to follow up	competing risks survival models	Not mentioned	None	Partially acknowledged implications of data completeness
Tangri N et al [78]	Metabolic acidosis is associated with increased risk of adverse kidney outcomes and mortality in patients with non-dialysis dependent chronic kidney disease: an observational cohort study	BMC Nephrology	2021	2007-2017	2010-2019	USA	multiple care settings	INCLUDE; states EHRs used	large US community based cohort; Optum's de-identified integrated electronic health records; Optum database holds longitudinal clinical data on 81 million insured and uninsured patients from several large healthcare provider organisations in all 50 US states and Puerto Rico; Data inlucded inpatient and outpatient EHRs and admin systems	CKD	non-dialysis-dependent CKD stages 3-5	73		0.47	at least 2 serum bicarbonate results	risk factor identification / causal inference	to investigate the association between metabolic acidosis with CKD progression and mortality, to idenitfy new modifiable risk factors in CKD	retrospective cohort study	3	min 1 year of EHR activity; 3 x eGFR <60; 3 x serum bicarbonare 12-29; 2 x serum bicarbonate measures, 28-365 days apart, both in same category (normal = 22-29; metabolic acidosis: 12-22); baseline eGFR 10-60	not available	32007	not available	not available	not available	Flow chart provided but does not show primary analysis population (with complete ACR data). 81 million in database; 319,126 extracted from database with 3 x eGFR<60, 3 x serum bicarbonate, 1 x serum bicarbonate 12-29; 51,558 with serum bicarbonate category definitions, 2 years FU data, baseline eGFR 10-60; 32007 with ACR data eligible for primary analysis. Not possible to compute percent of targe…	eGFR	CKD-EPI	percent change in eGFR from baseline	>=40% decline in eGFR from baseline at any time, based on 90-day averages at baseline and follow-up (this is the eGFR component of composite outcome)	RRT40: >=40% decline in eGFR from baseline or RRT	percent change in baseline >=40% from baseline at any time; baseline = avg eGFR over 90 days prior to index date; "event" eGFR = point at which average eGFR over last 90 days results in a >=40% decline	time to event analysis	outcome	N/A	primary outcome	Cox PH regression	Cox PH regression	Primary analysis was composite of 40% eGFR decline, RRT and death (DD40); secondary analyses in components, including kidney specific outcome RRT40 (40% decline of RRT). Cox PH regression for full duration analysis; logistic regression for additional 2-year analysis; Cox models censored at last ineraction with health system or end of FU (March 2017); Kidney-specific outcome (RRT40) additionally c…	median 3.9 years	3.9	Presence of metabolic acidosis is an independent risk factor for the composite outcome of CKD progression and death	Mentioned sample completeness but not implications	None	Not mentioned	None	Not mentioned	None	Partially acknowledged implications of data completeness
Vesga JI et al [79]	Chronic kidney disease progression and transition probabilities in a large preventive cohort in colombia	International Journal of Nephrology	2021	2009-2018	2010-2019	Colombia	multiple care settings	INCLUDE; states EHRs used	Data on patients enrolled in a CKD prevention program; primary and secondary care	CKD	CKD stages 3-4 diagnosed by a nephrologist	70		0.48		estimation of incidence/ prevalence	to estimate the probability of transitions between CKD stages over time	retrospective cohort study	2	at least 2 x eGFR <60 for inclusion in main analysis; at least 4 x eGFR to estimate CKD progression rate (linear model);	3048	2752	1783	0.9	0.65	3048 patients identified; 2752 met eGFR inclusion criteria; 969 completed study;	eGFR	CKD-EPI	Transition between CKD stages	percent moved to each CKD stage category over 6-month periods, looks like patients included for every 6-month period but no adjustment for pt correlation	transition between CKD stages	probabilities of transition to CKD stages over 6-month periods		outcome	N/A	secondary outcome	descriptive results only	crude estimation	Main analysis of eGFR: to estimate probabilities of transition between CKD stages over 6 month periods; looks like patients are included in percentage calculations every time they start from a certain CKD stage, throughout the study. If patients are included multiple times, there does not appear to be adjustment for patient correlation. Analysis repeated by subgroup.	"minimum of 5 years" stated but actual follow up not clear	not stated	Patients generally tend to remain in their current CKD stage over 6-month periods; Probability of transition to the next CKD stage is higher in diabetic and glomerulonephritis CKD patients	Mentioned sample completeness but not implications	None	Mentioned losses to follow up but not implications	None	Not mentioned	None	Not relevant (no covariate analysis)
Yanagawa et al [80]	Retrospective study of factors associated with progression and remission/ regression of diabetic kidney disease-hypomagnesemia was associated with progression and elevated serum alanine aminotransferase levels were associated with remission or regression	Diabetology international	2021	2003-2019	2010-2019	Japan	hospital	INCLUDE; states EHRs used	electronic medical records of institution (Nerima General Hospital); unclear what data used, likely outpatient only but not clear	diabetic kidney disease	patients with type 2 diabetes receiving treatment with oral antidiabetic drugs other than SGLT2 inhibitors	62		0.66		risk factor identification / causal inference	to investigate the association between clinical factors and progression and remission//regression of diabetic kidney disease	retrospective cohort study	not stated	not stated	690	681	complete case analysis	0.99	complete case analysis	No flow chart; analysis based on patients with complete follow up data; 690 patients extracted with diabetes ; 681 patients with complete data for analysis (follow up duration varies between patients depending on last follow up)	eGFR	Japanese formula	(time to) transition between CKD stages	transition between: low risk or moderately increased risk or high risk categories to the very high risk category between first day of prescription and last consultation (risk categories based on combined proetinuria and eGFR)	diabetic kidney disease progression	transition between: low risk or moderately increased risk or high risk categories to the very high risk category between first day of prescription and last consultation (risk categories based on combined proetinuria and eGFR)	RISK CATEGORIES: low risk: prot (-) eGFR>=60. moderate: prot (-) eGFR 45-59.9; prot (+-) eGFR >=60; high: prot (-) eGFR 30-44.9; prot (+-) eGFR 45-59.9; prot (+) eGFR >=60; very high: prot (-) eGFR <30; prot (+-) eGFR <45; prot (+) eGFR <60. [+- = trace]	outcome	N/A	primary outcome	Cox PH regression	Cox PH regression	Progression of DKD defined as transition between low, moderate and high risk categories to very high risk categories, where categories combine proteinuria and eGFR data. Cox PH regression for progression. Additional analyses of eGFR decline per year (not defined) using logistic regression. Patients in the very high risk category were generally included in analysis, with 2 different models used. M…	mean 6.2 years	6.2	Advancing age, serum Mg, and serum HbA1c were associated with progression of DKD	Tackled methodologically	Detailed/ comprehensive database of EHRs used	Not mentioned	None	Not mentioned	None	Partially acknowledged implications of data completeness
[truncated: 9 more columns]
